# Supplementary material for: Development of a Novel Rabies Simulation Model for Application in a Non-endemic Environment
Source: PubMed Central journal article supplement (PMC4482682; doi:10.1371/journal.pntd.0003876), 2015-06-26

# NPA NI

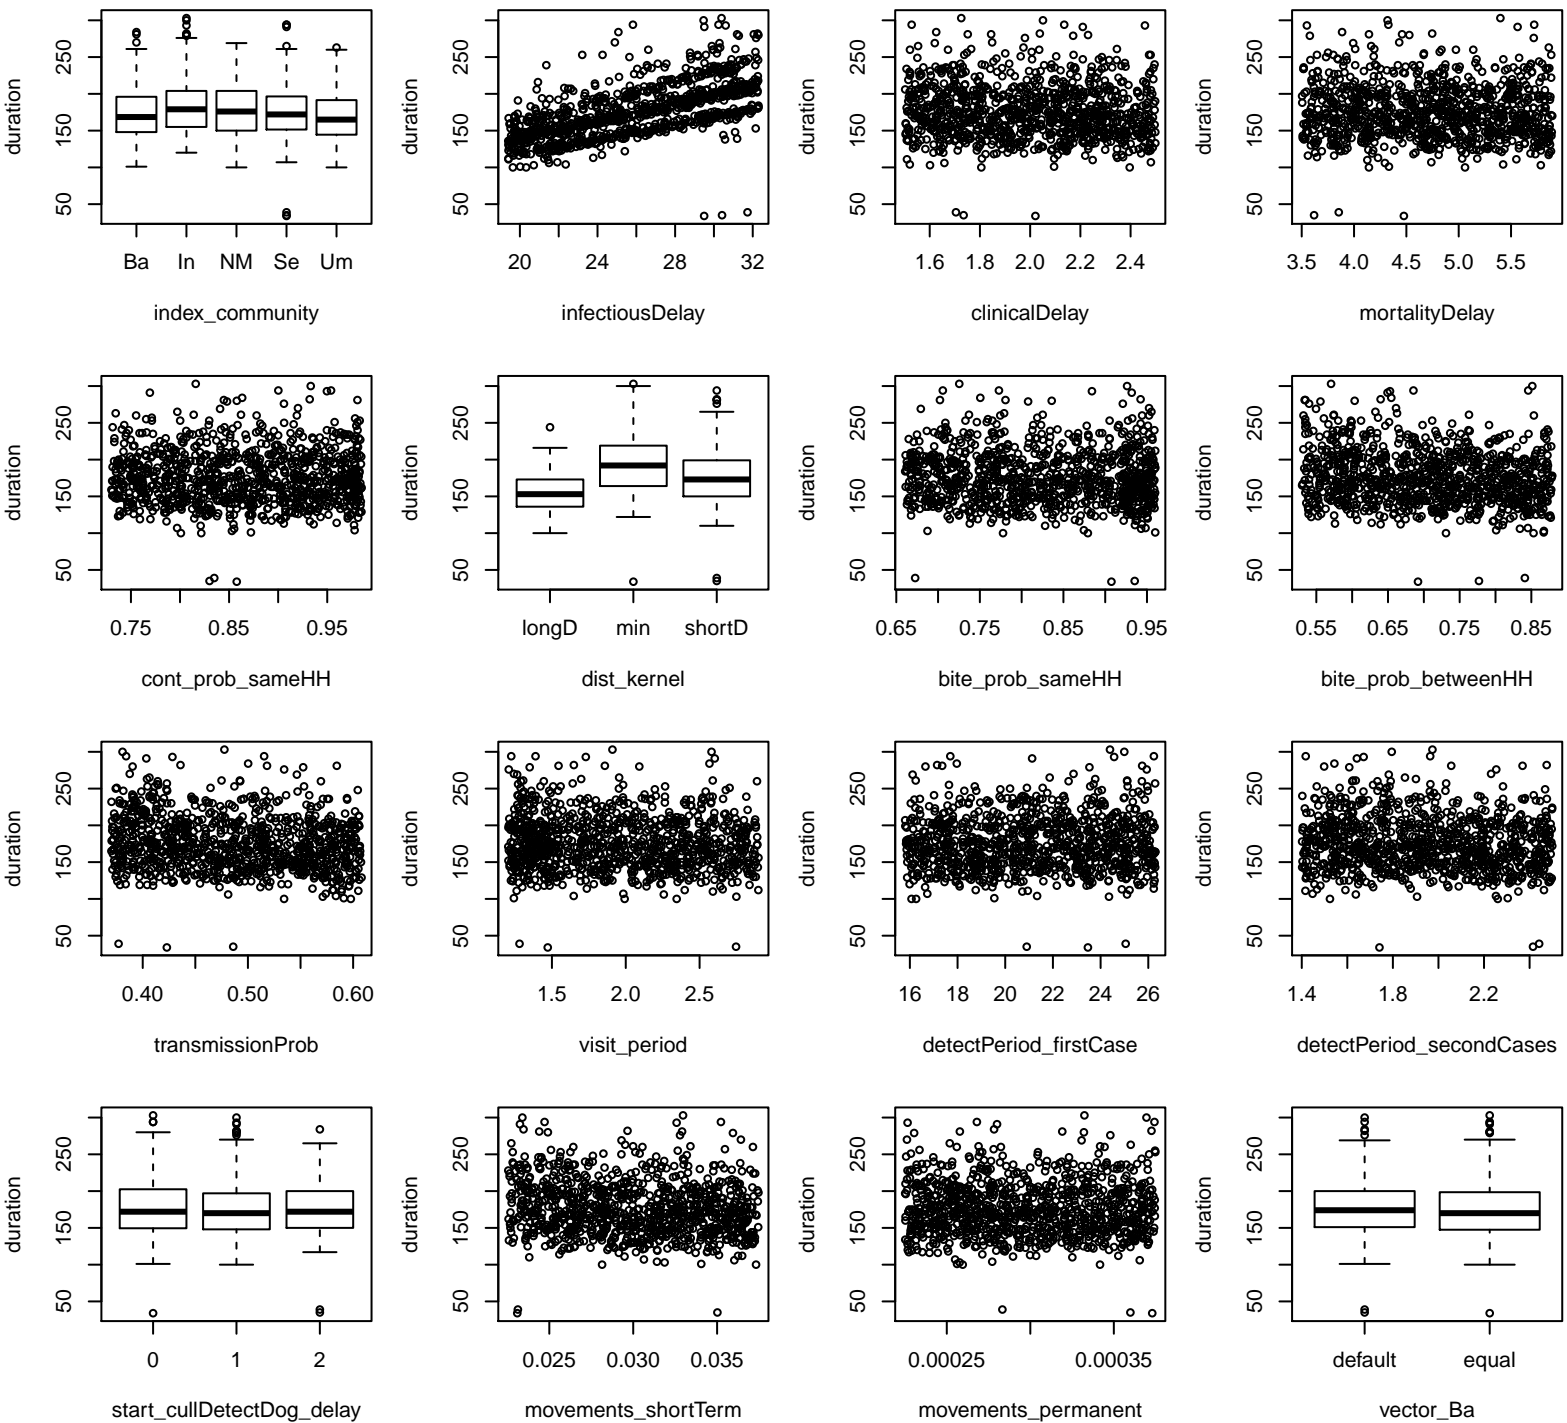

# NPA MB

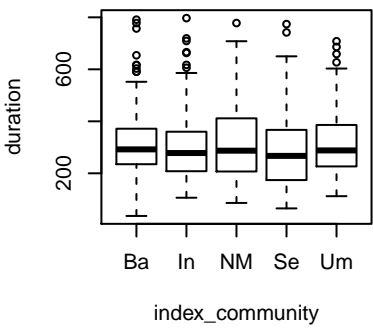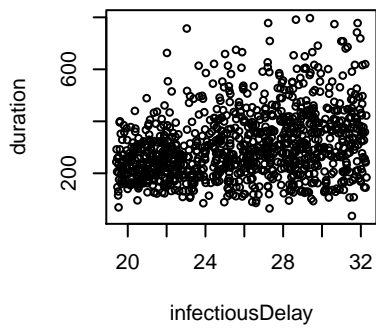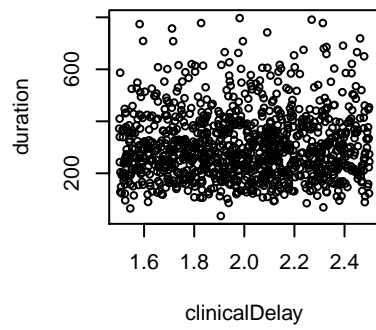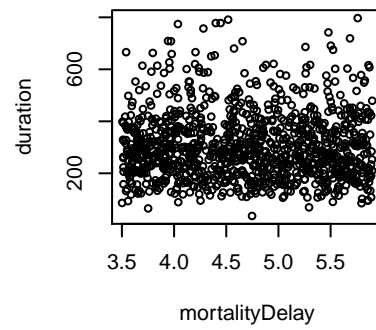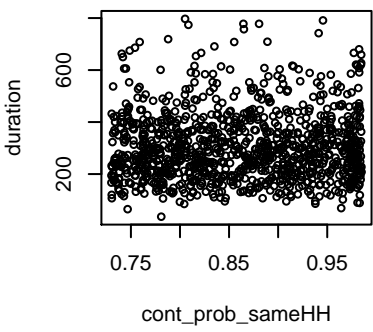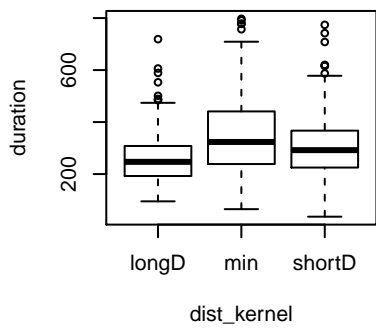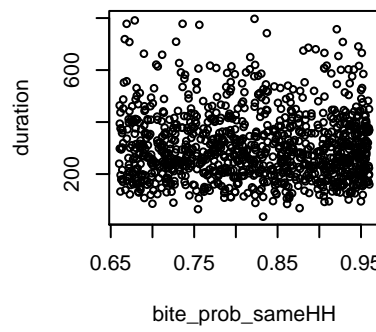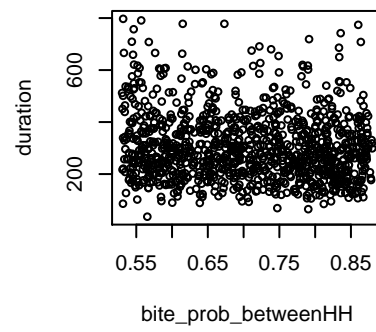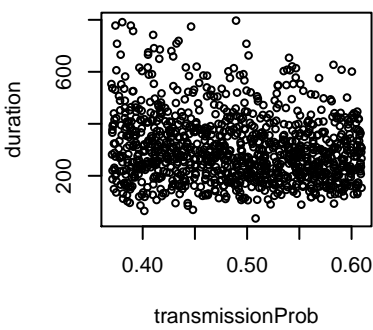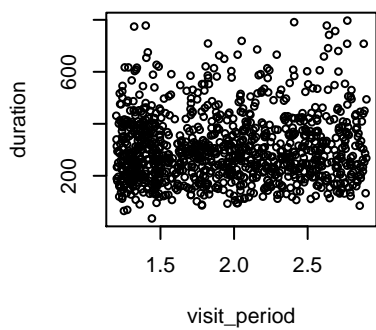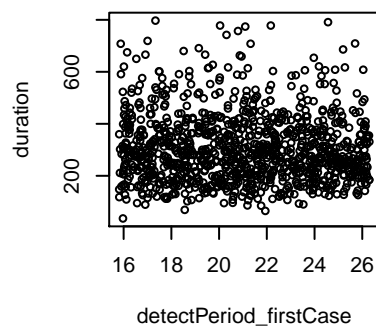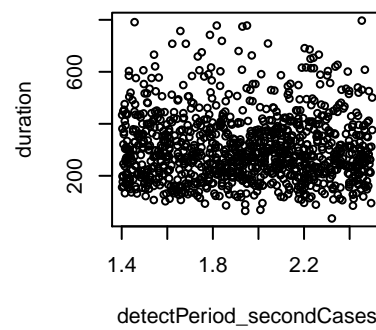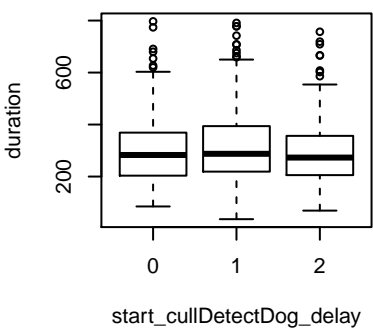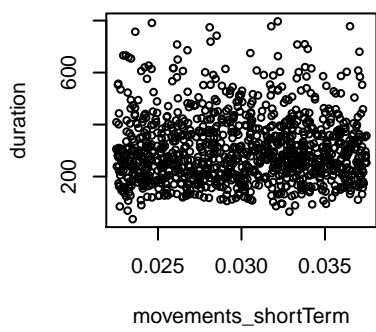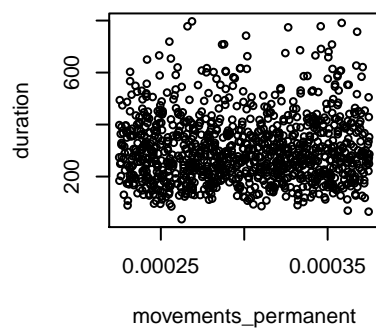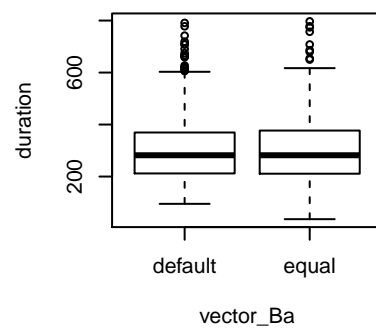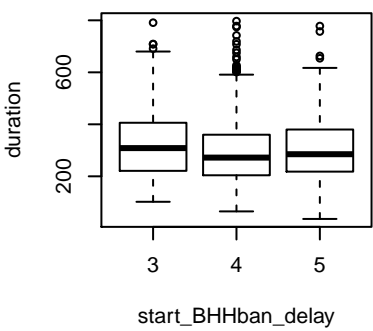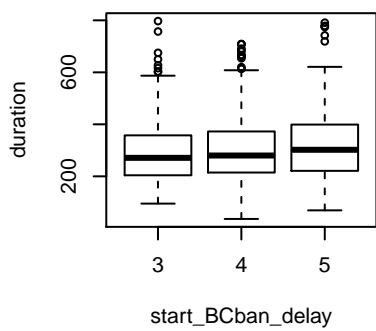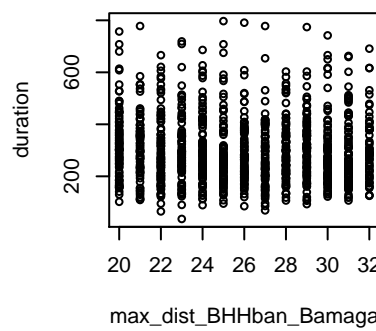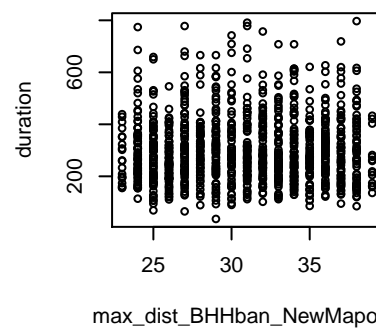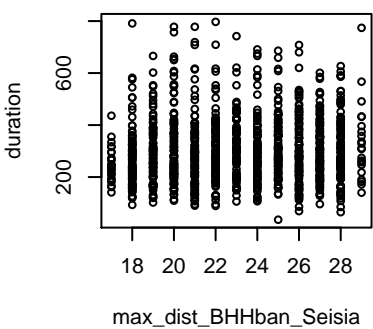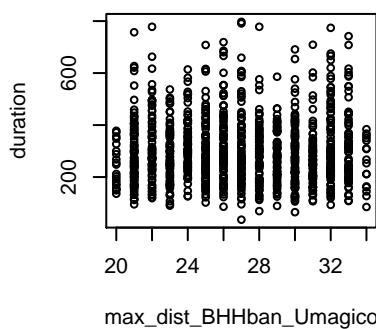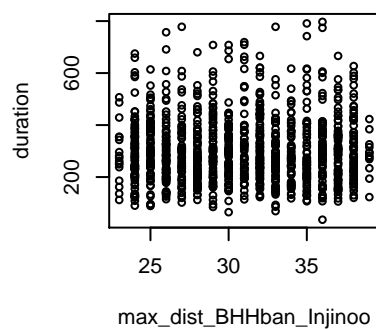

# NPA CC

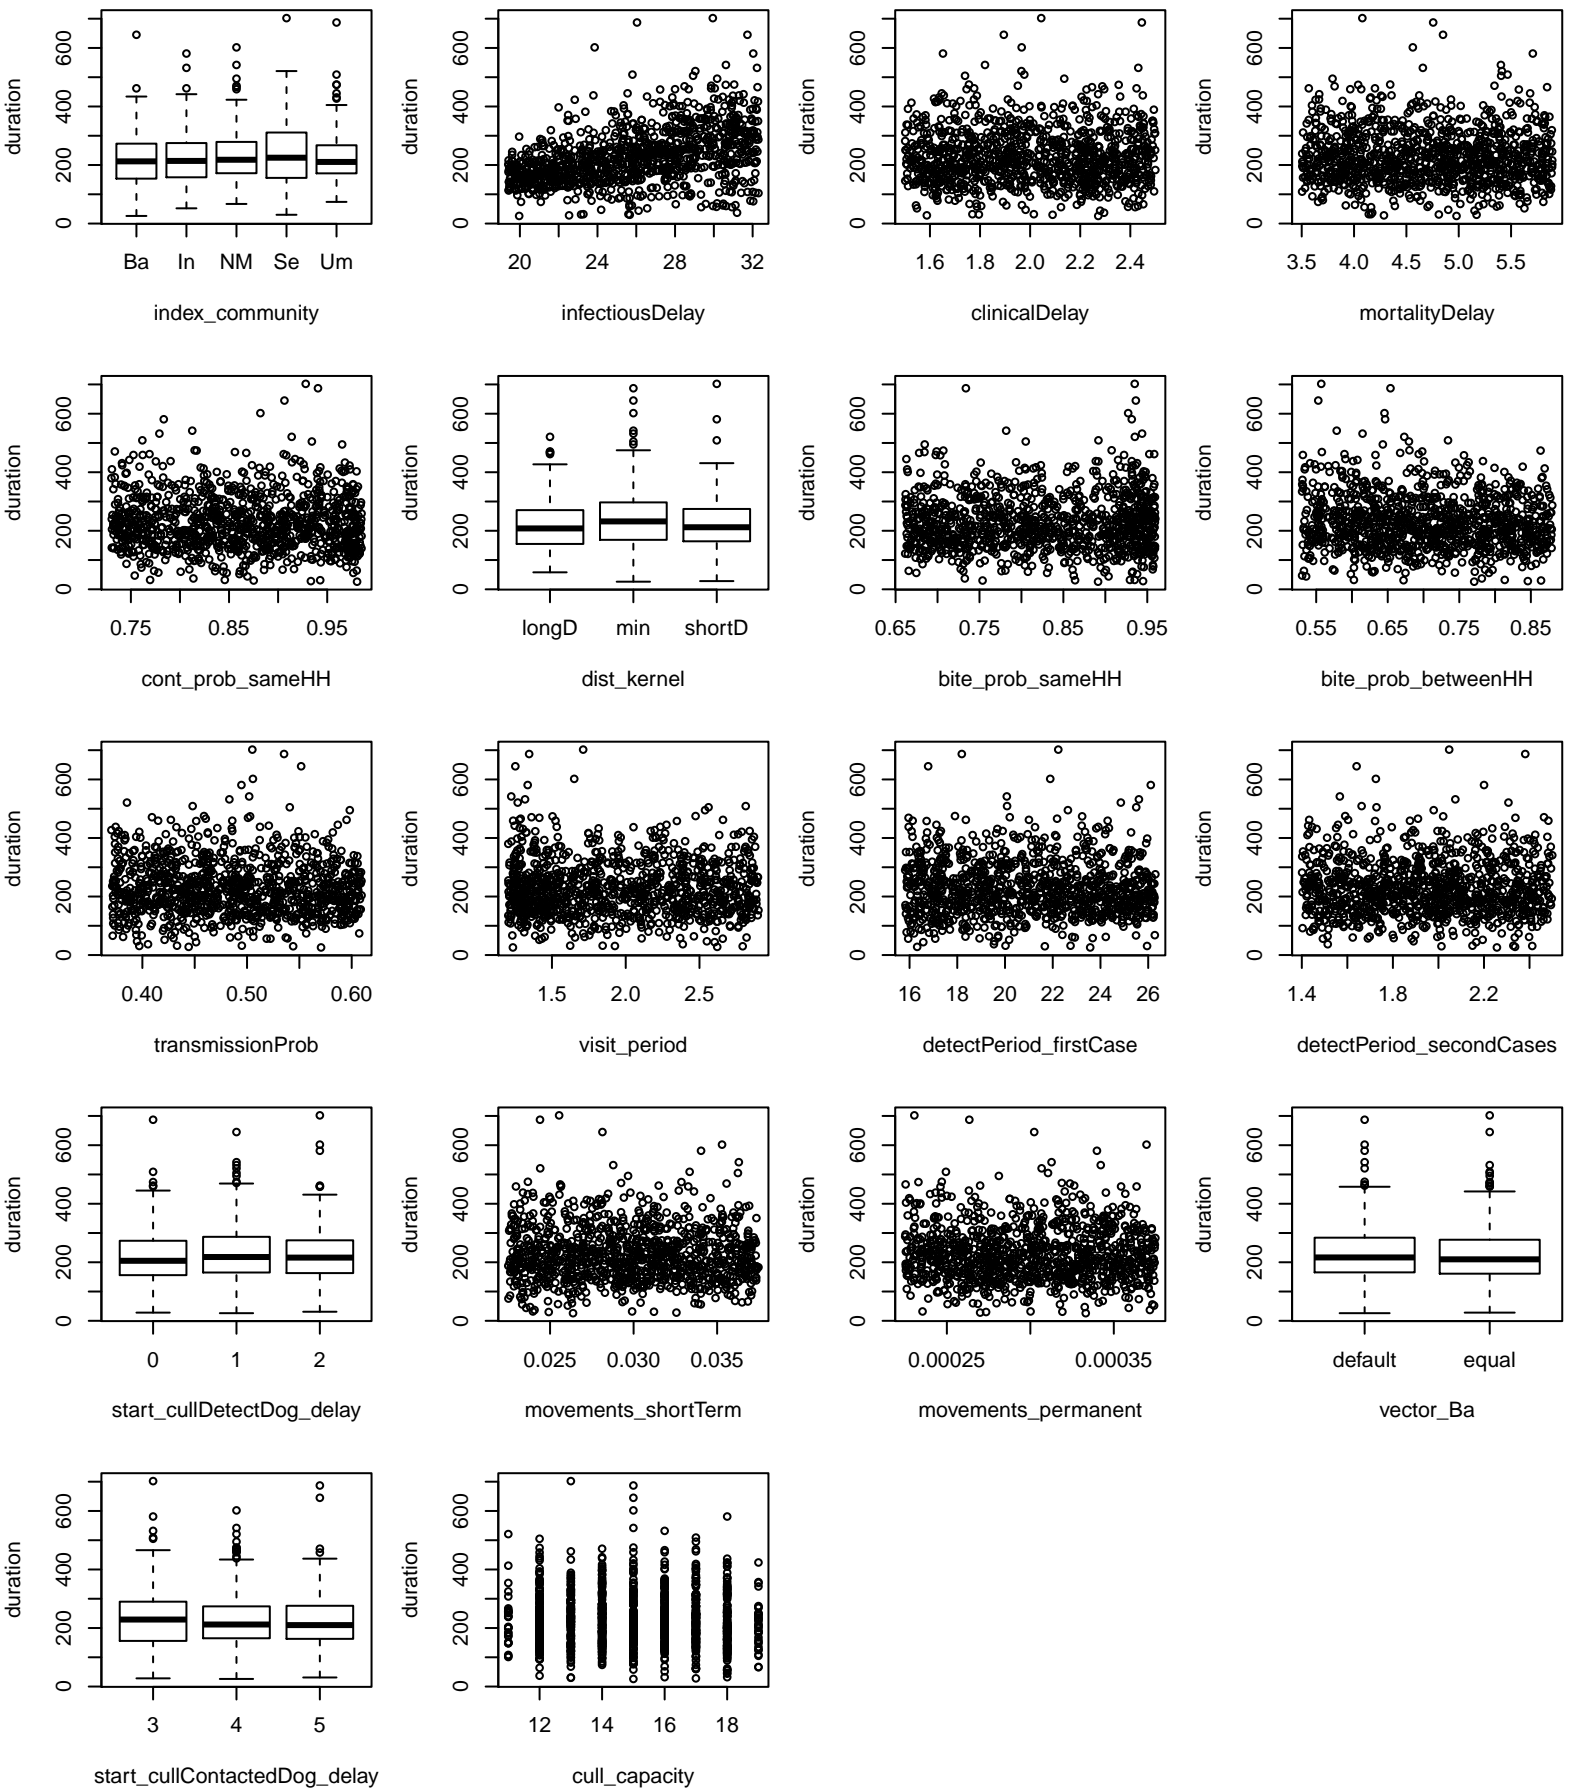

# NPA RC

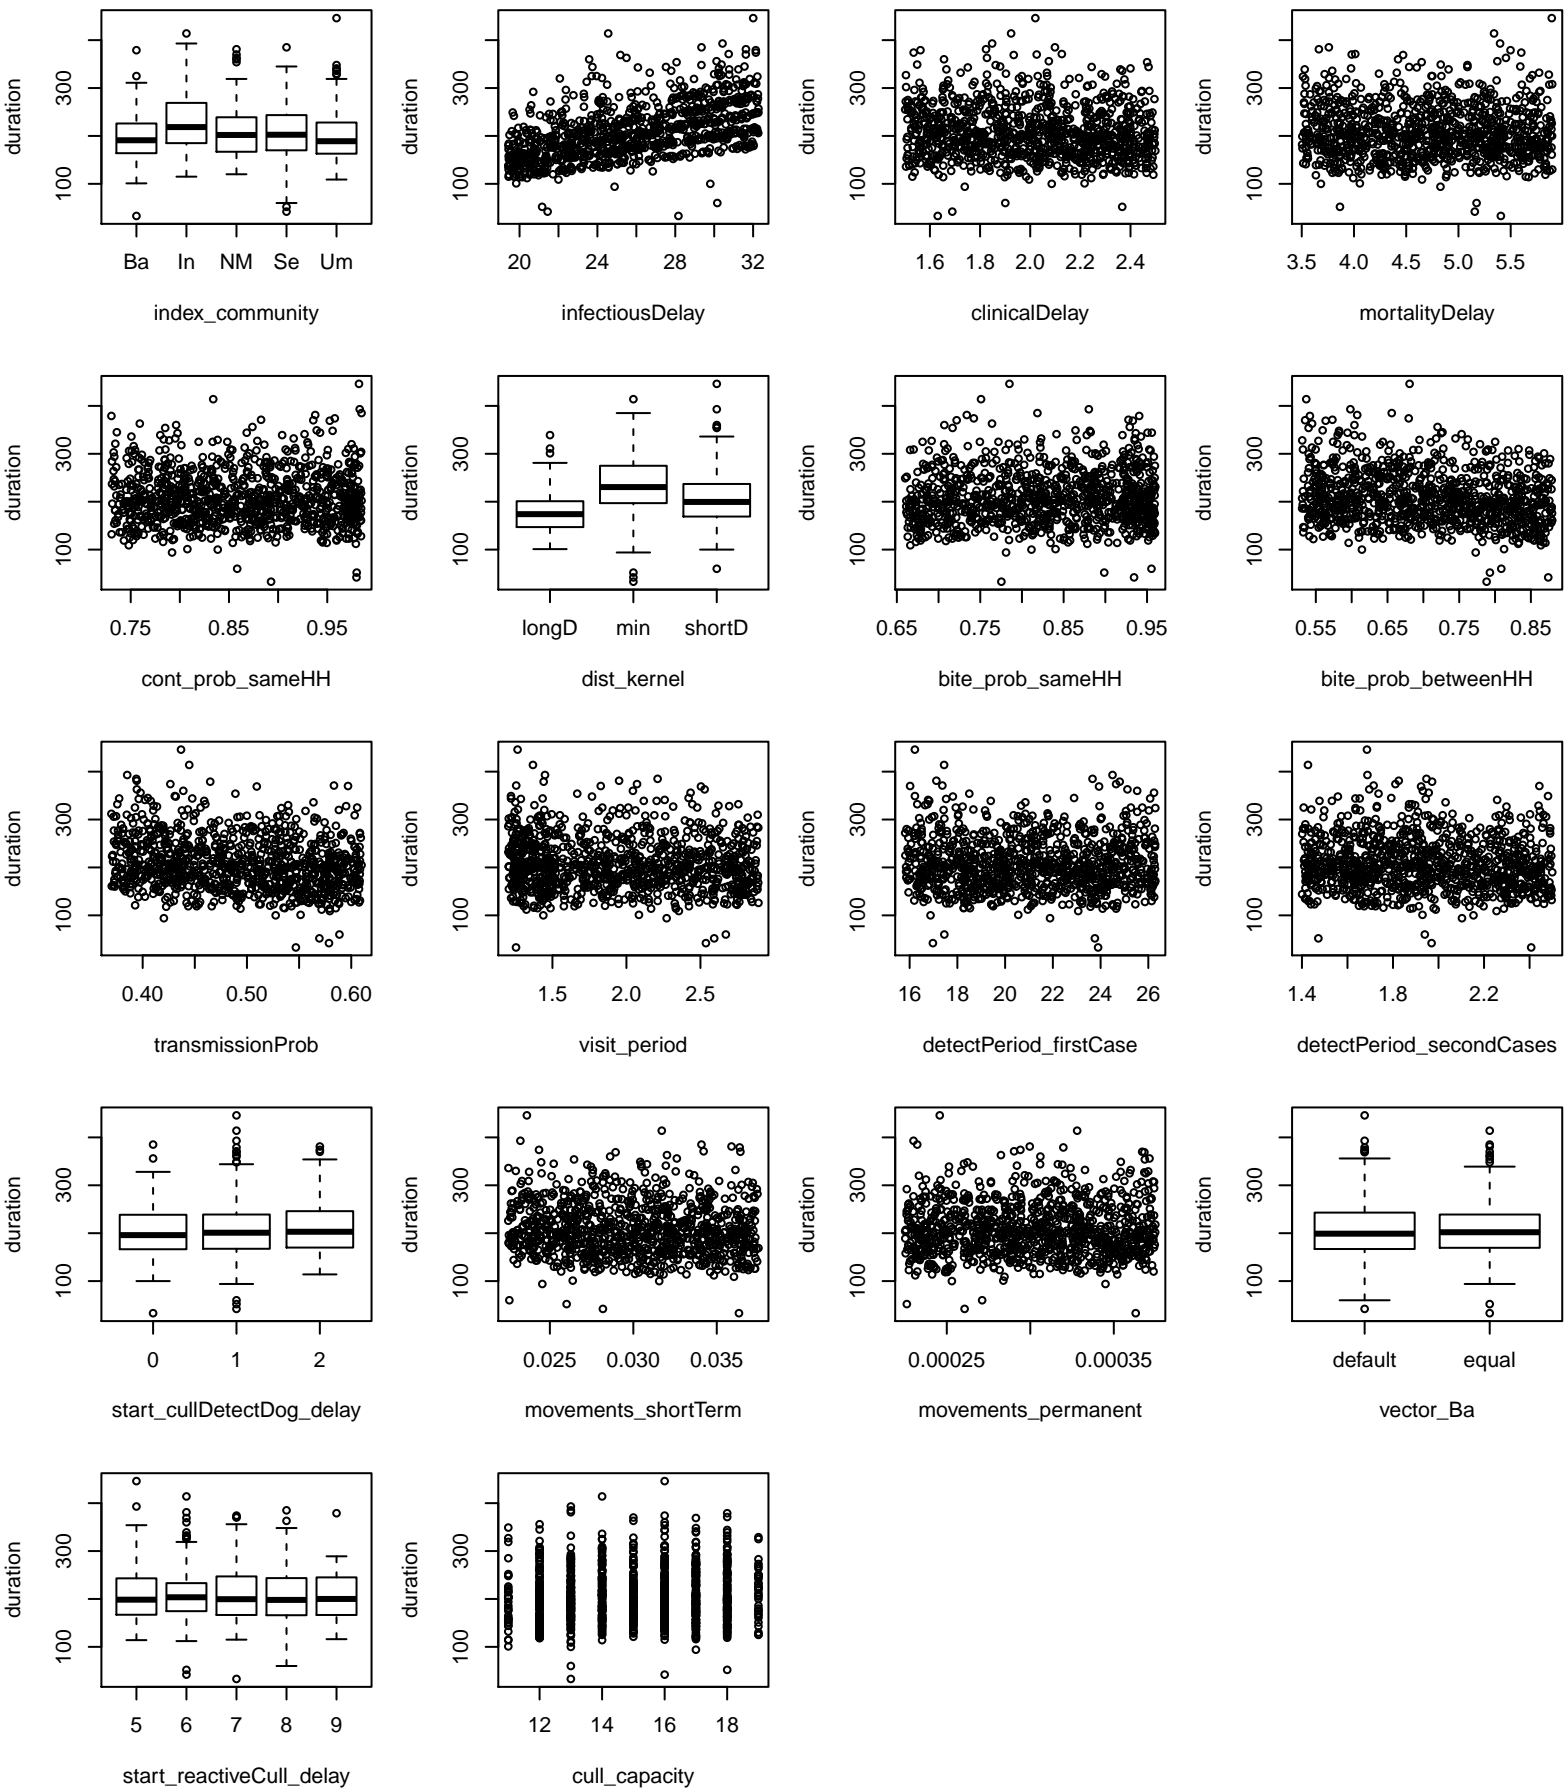

# NPA PV

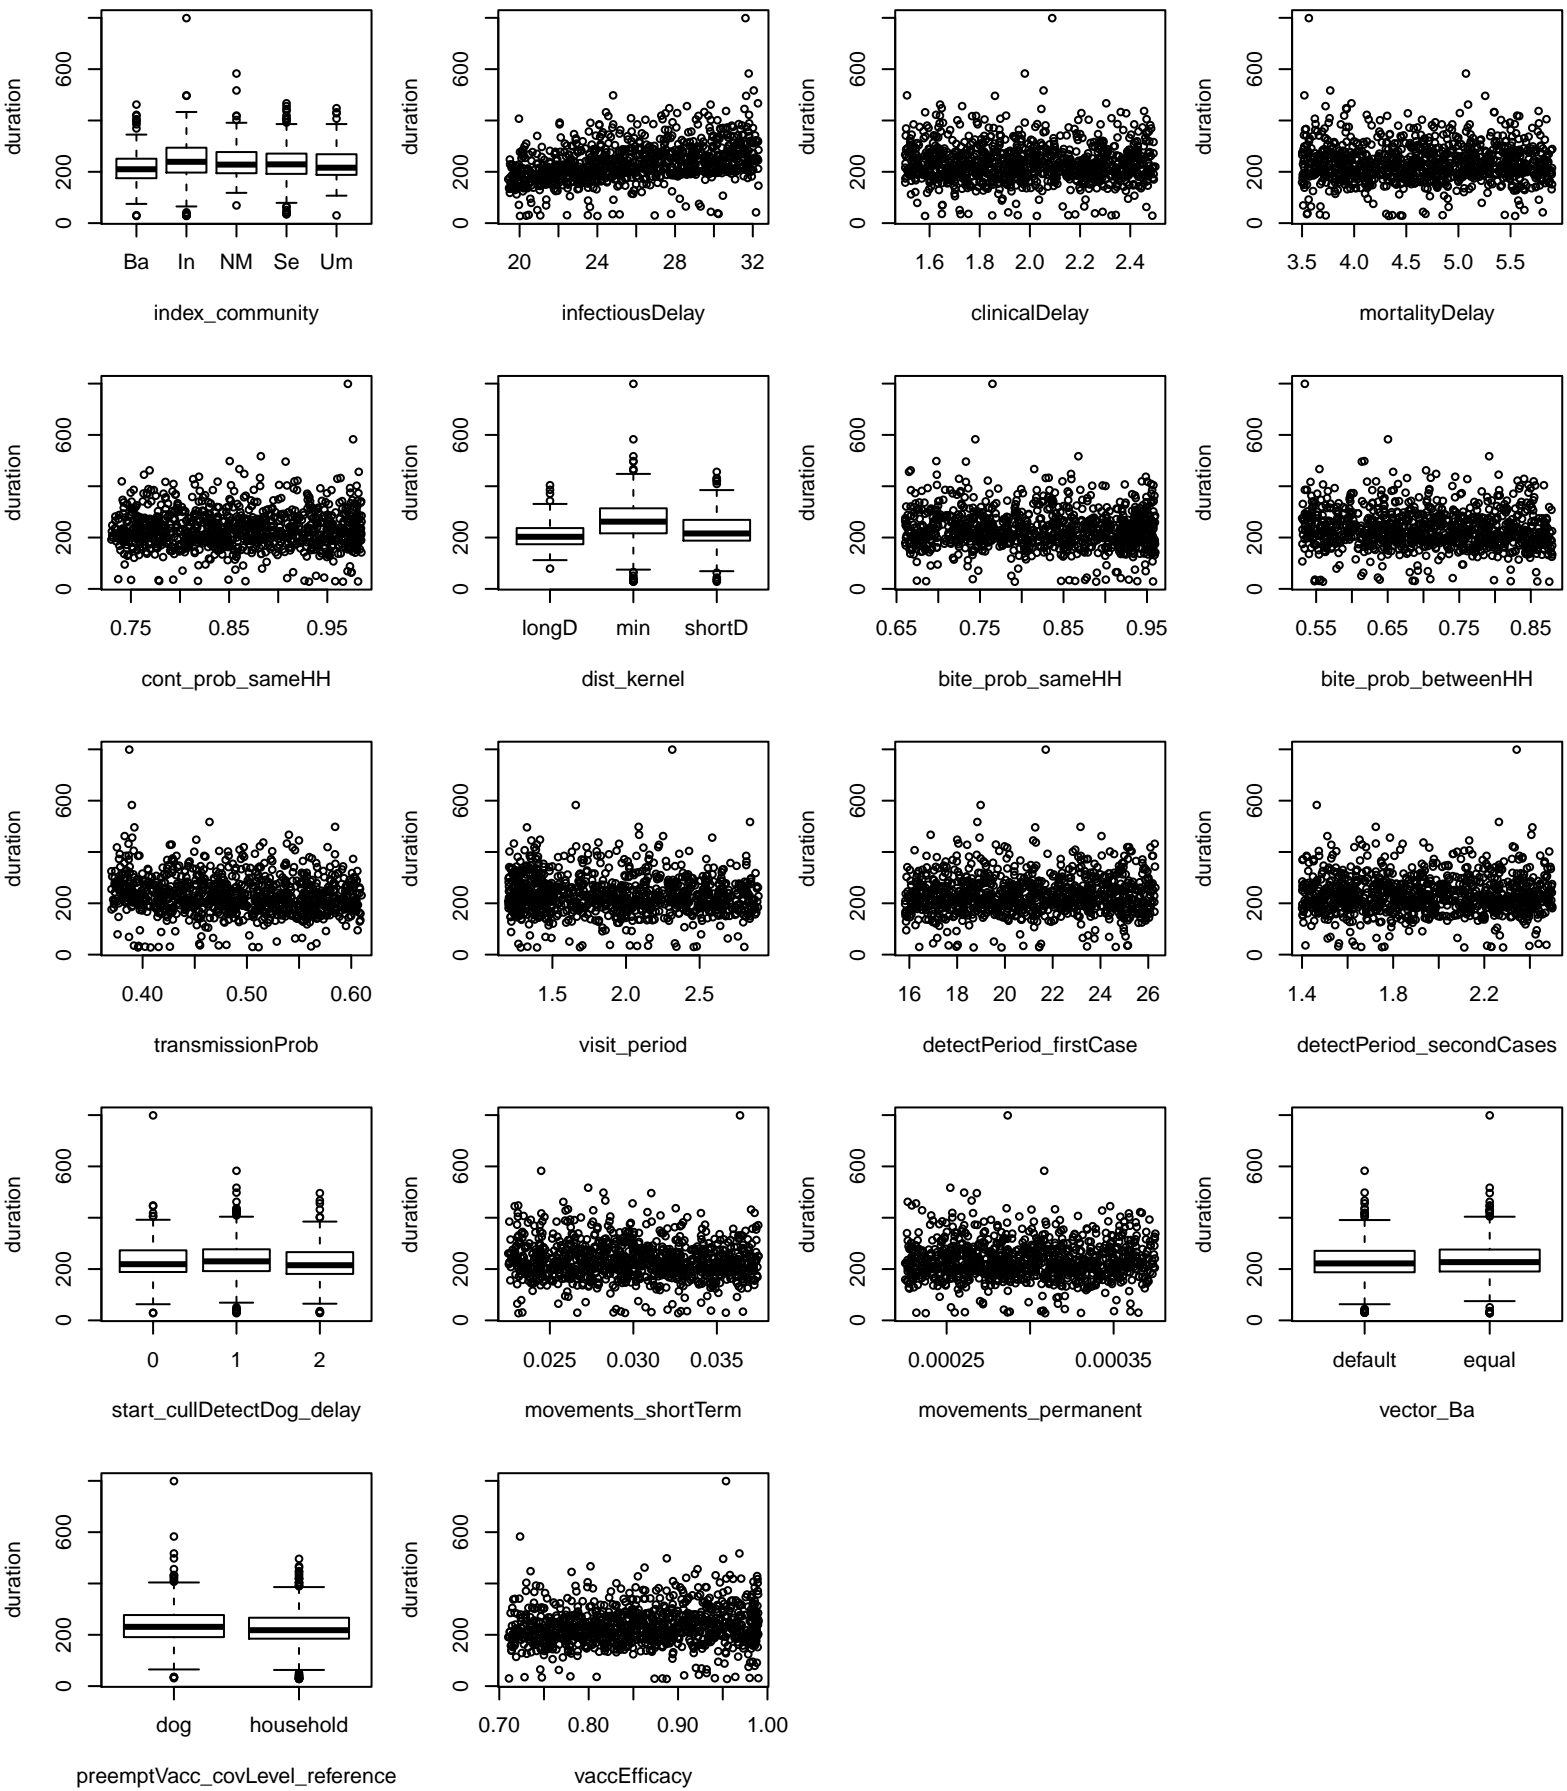



# Elcho NI

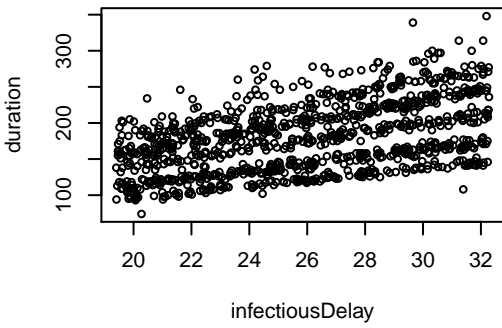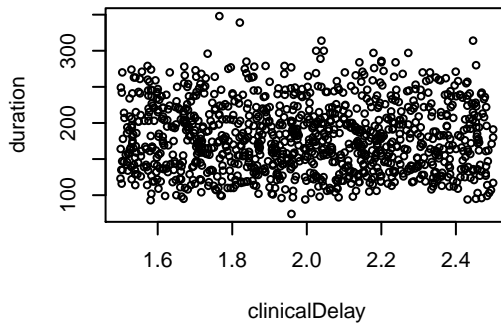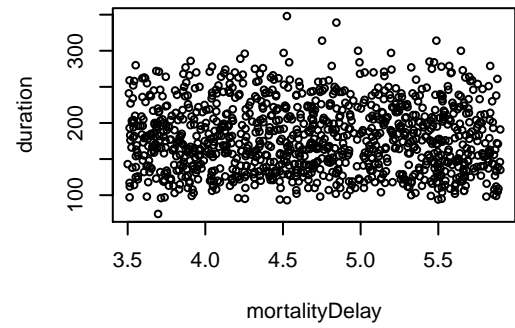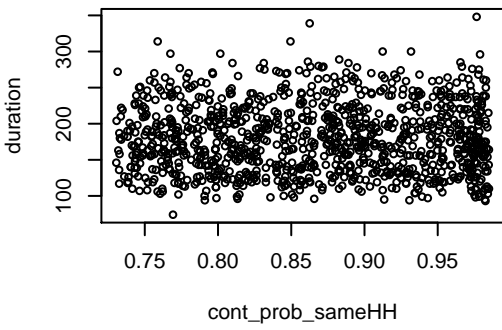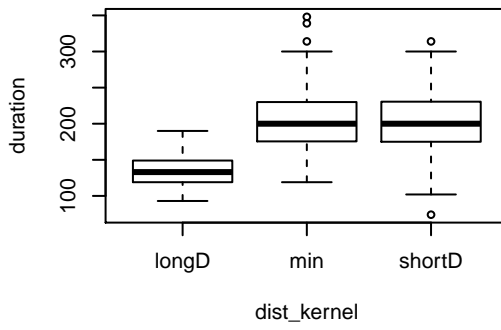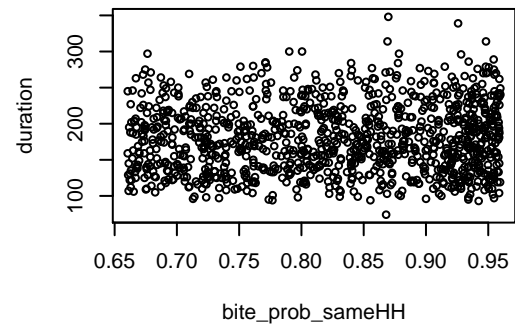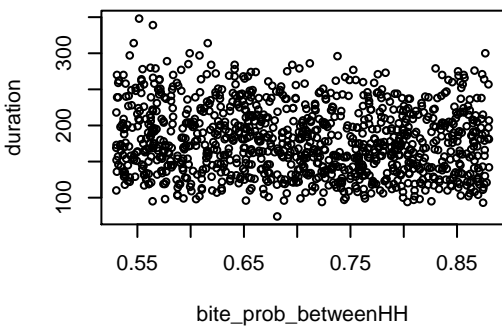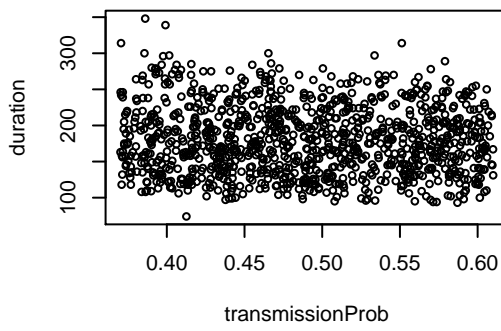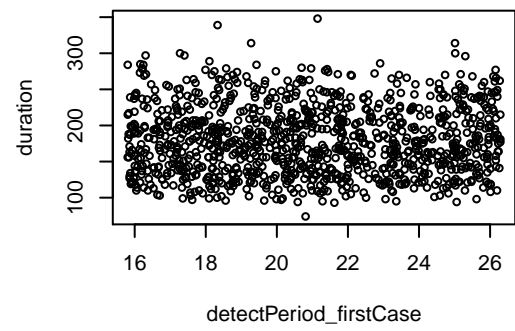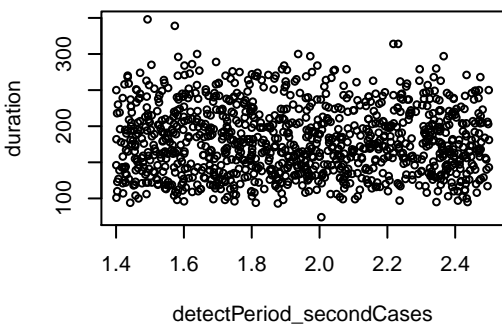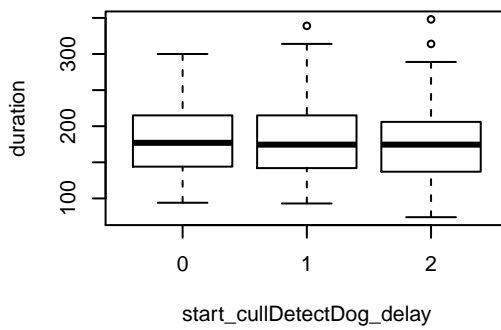

# Elcho MB

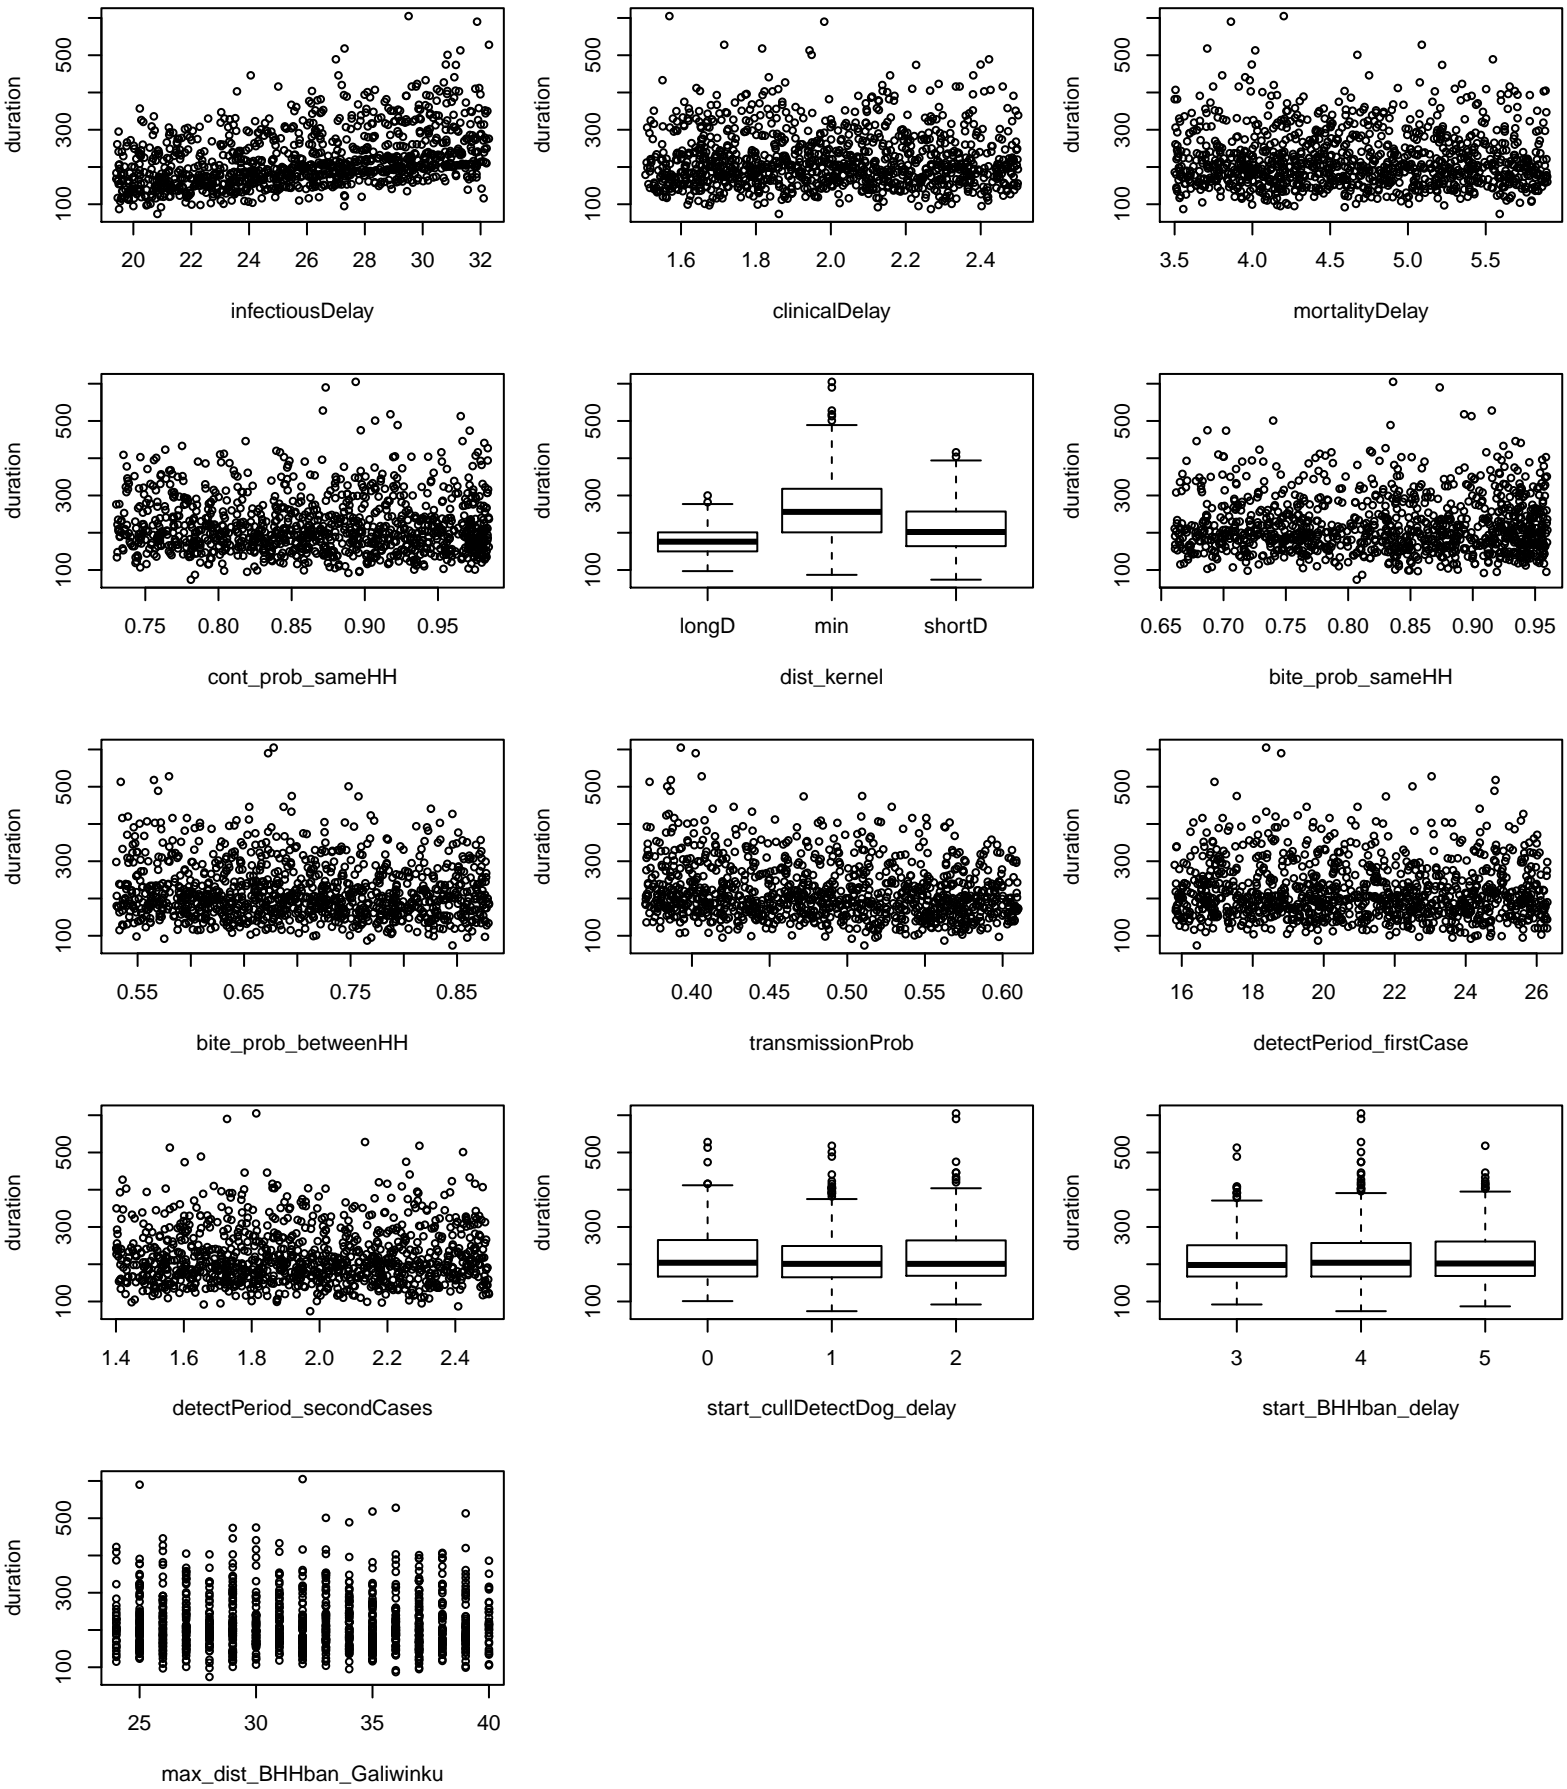



# Elcho CC

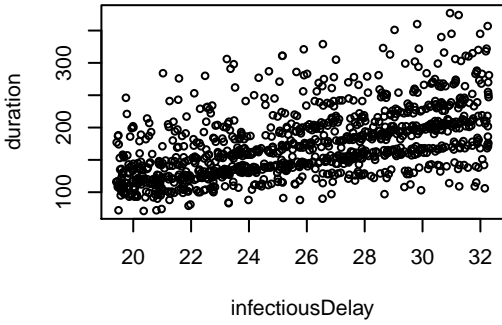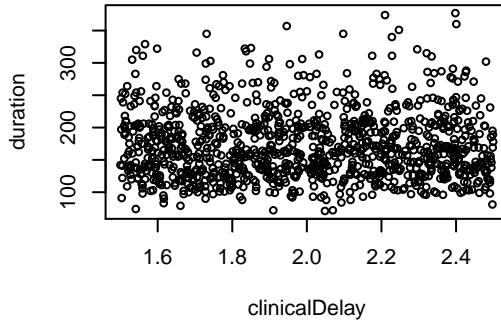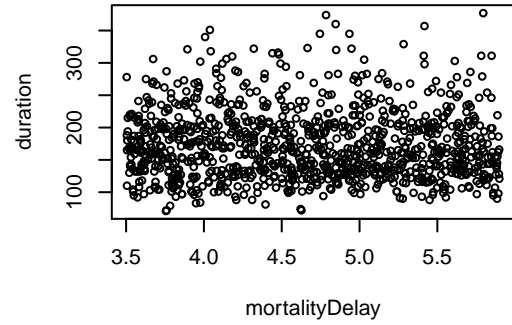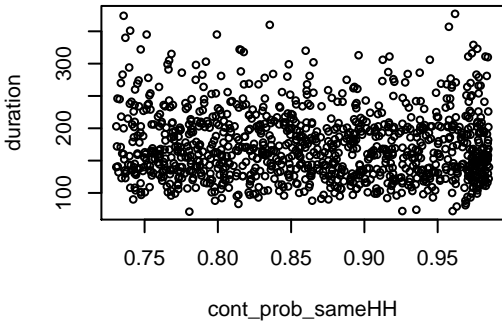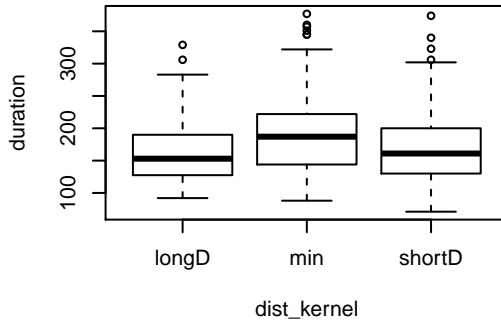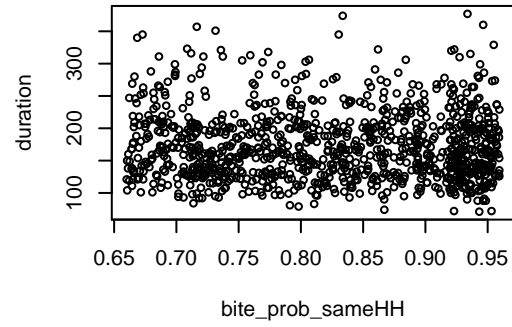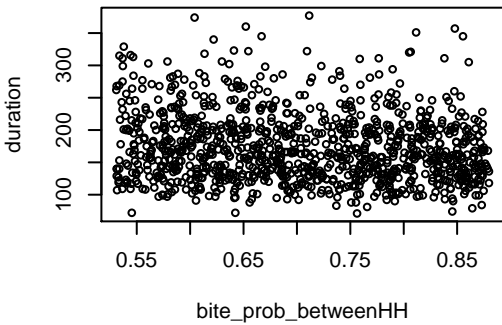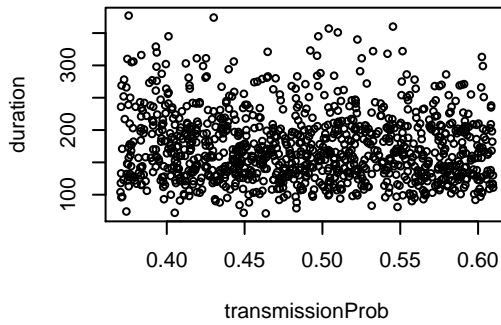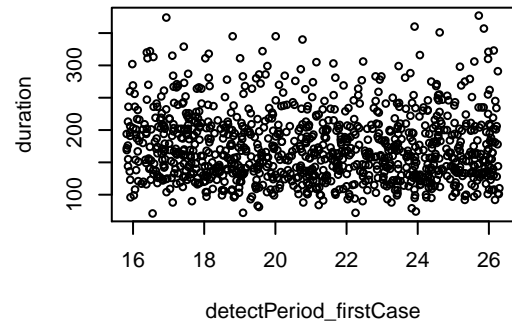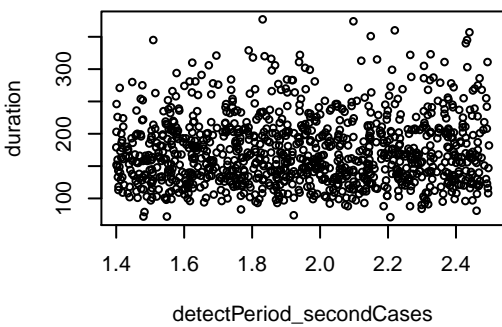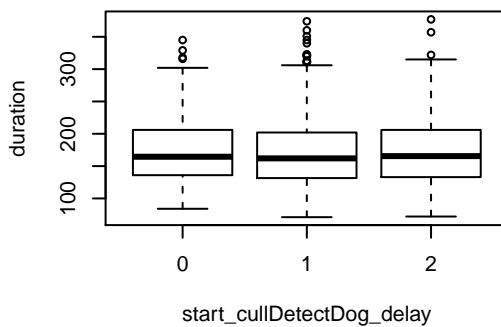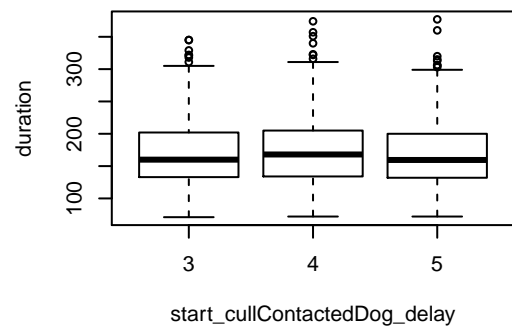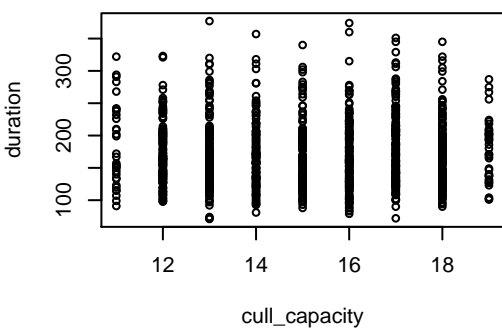

# Elcho RC

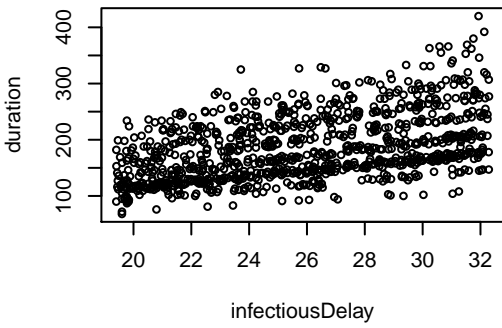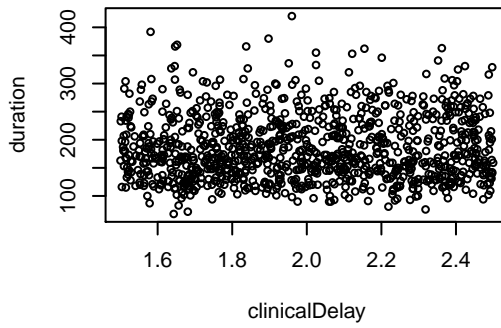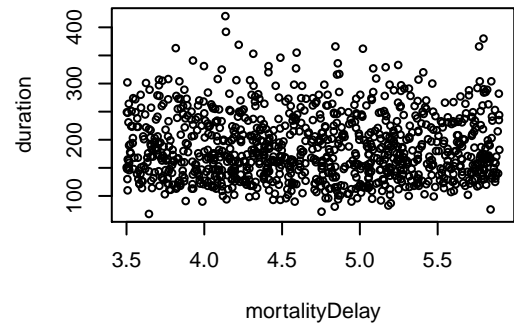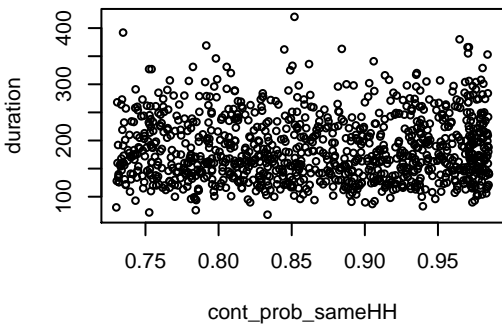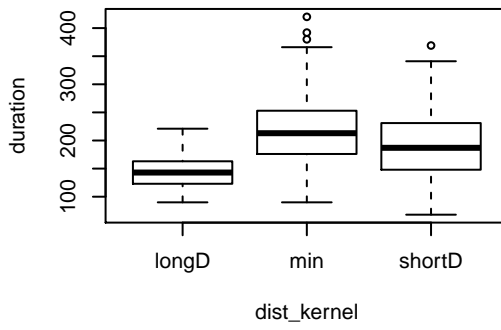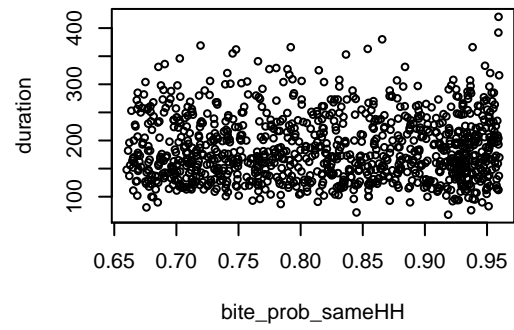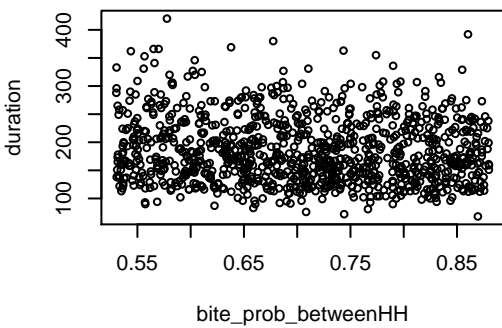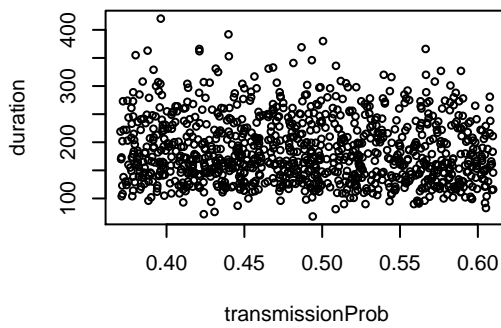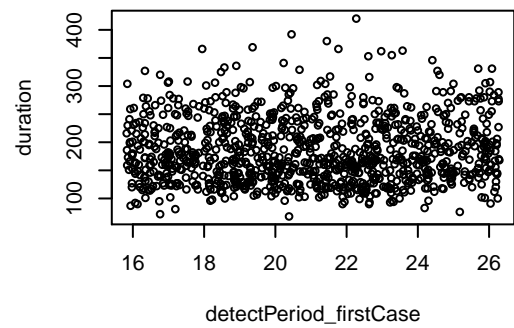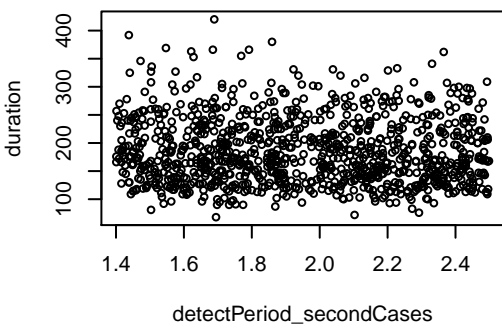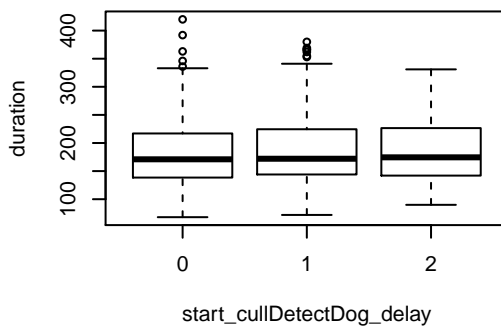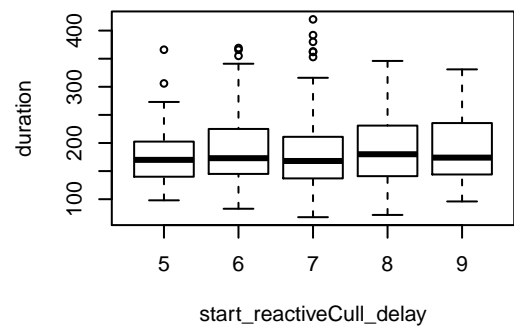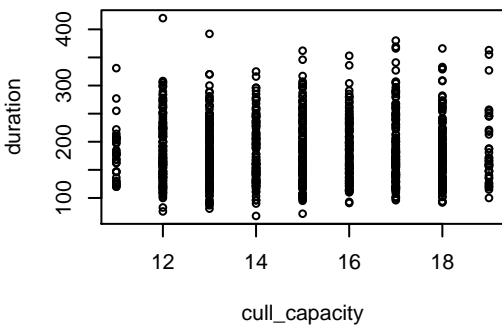

# Elcho PV

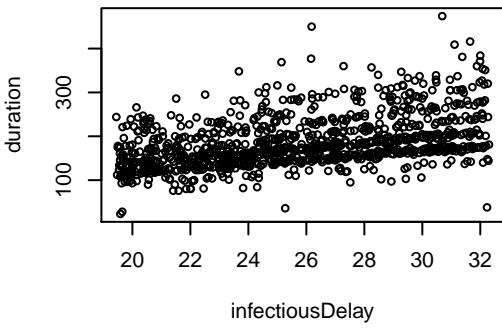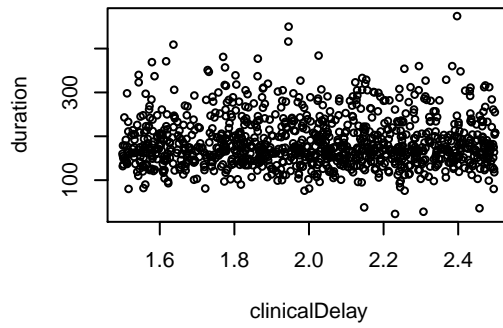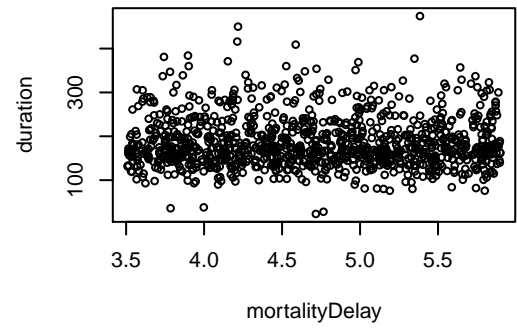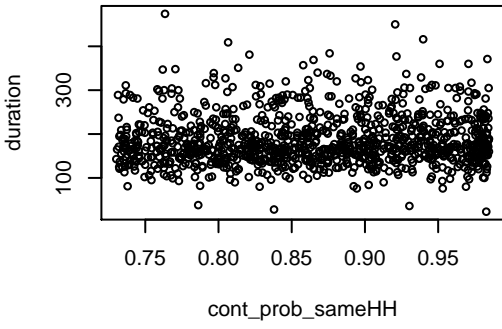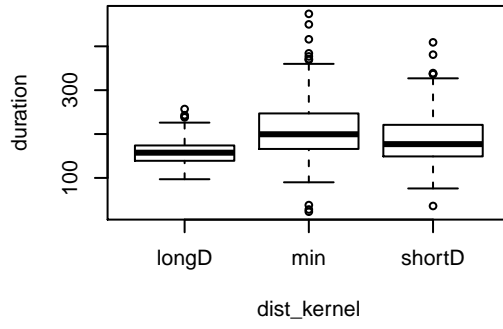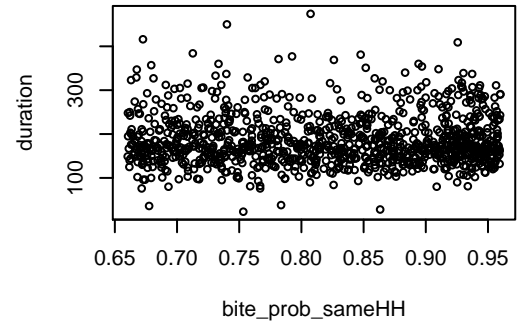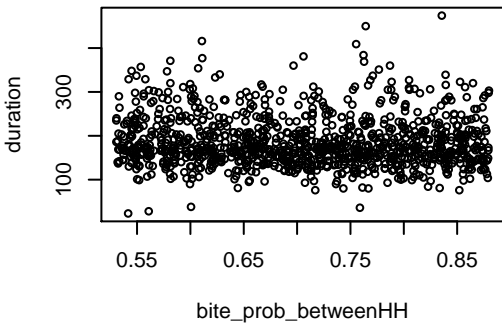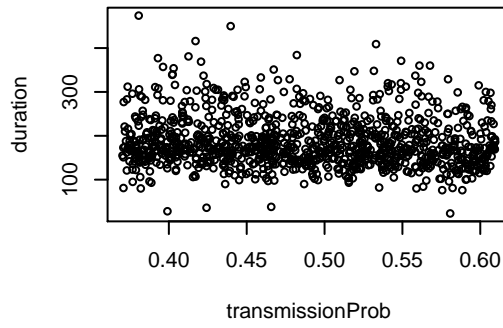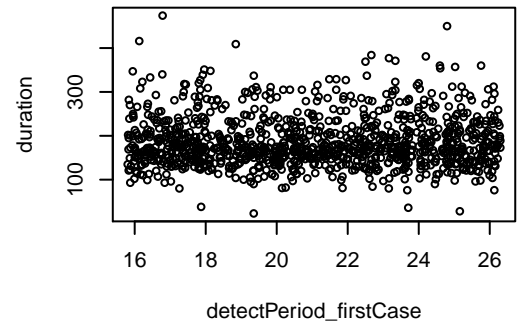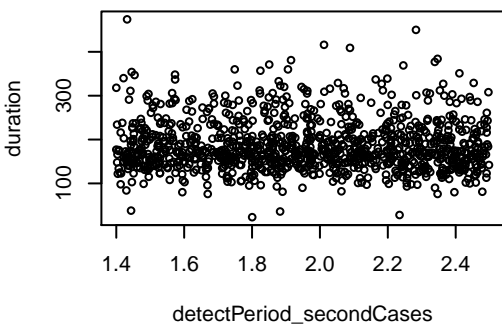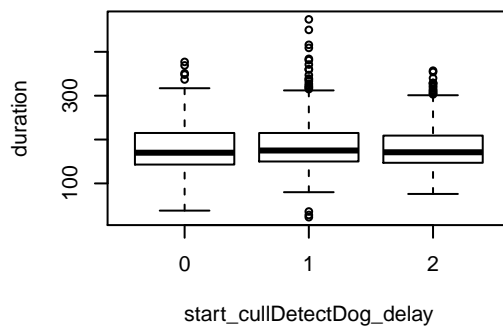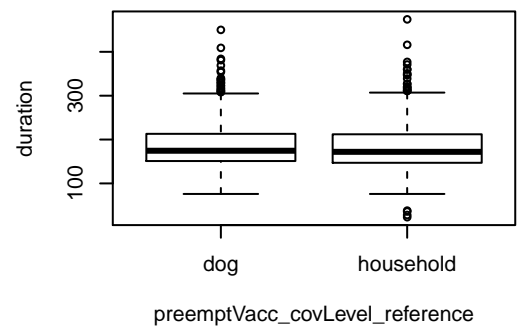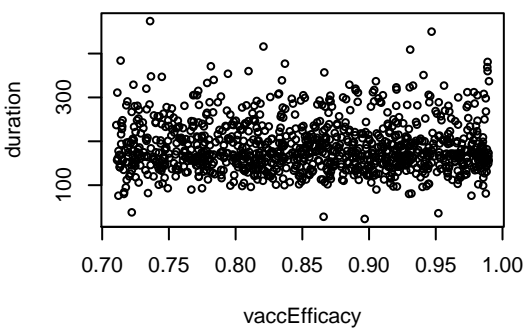

# Elcho RV

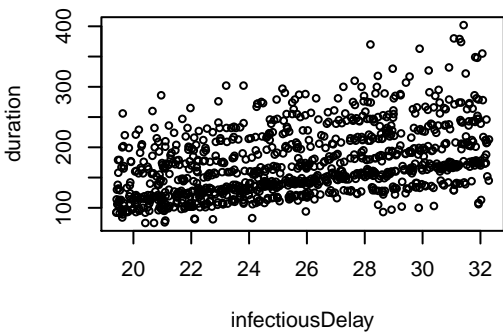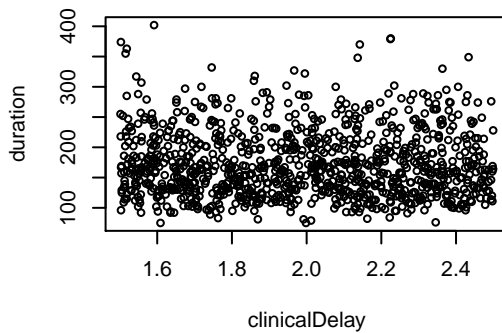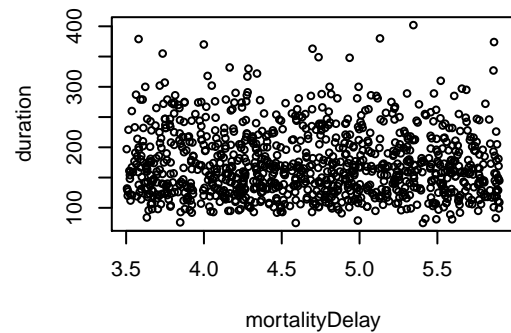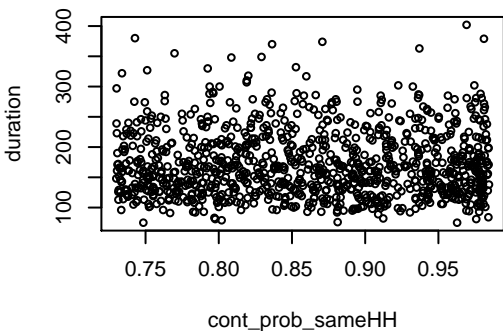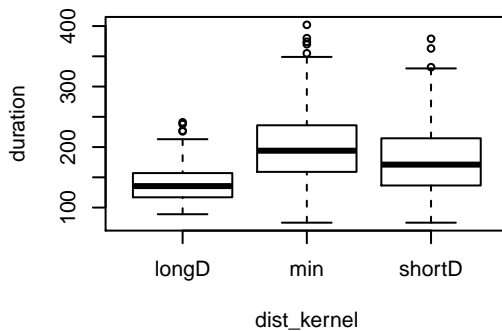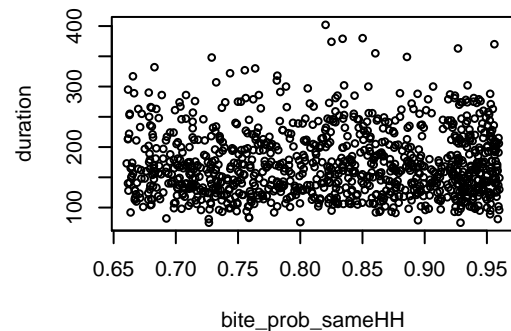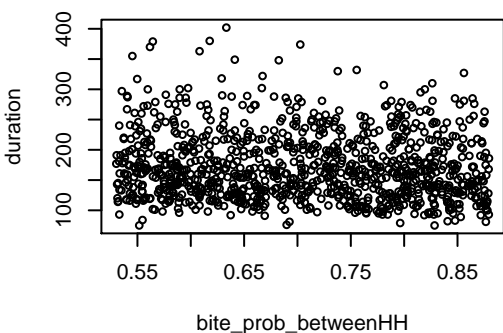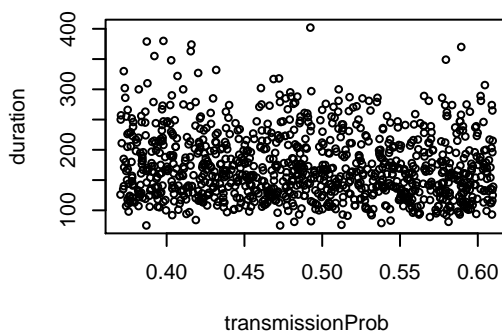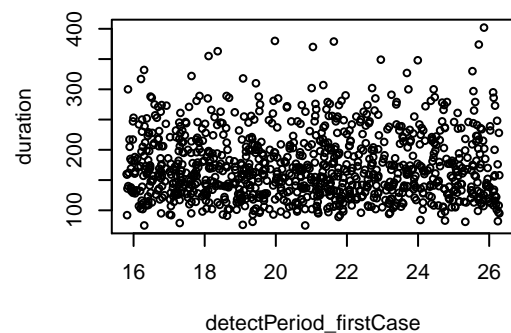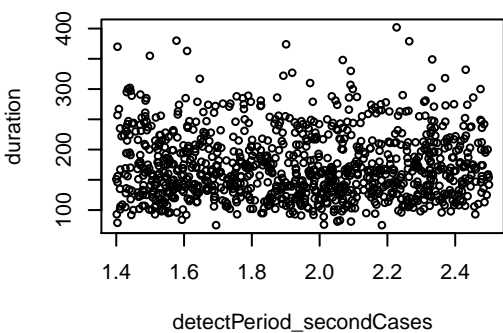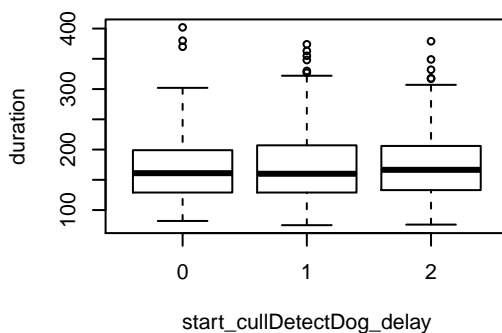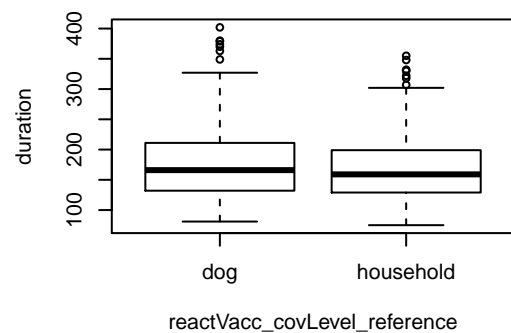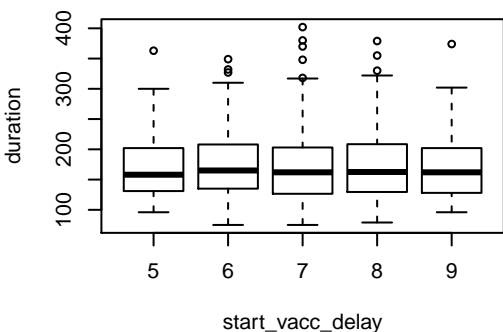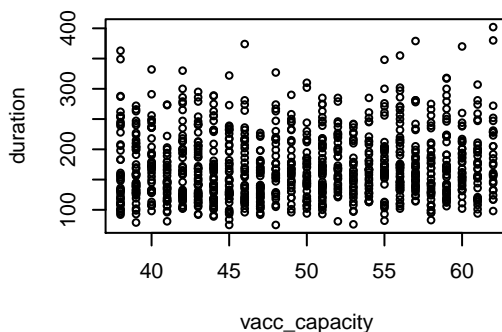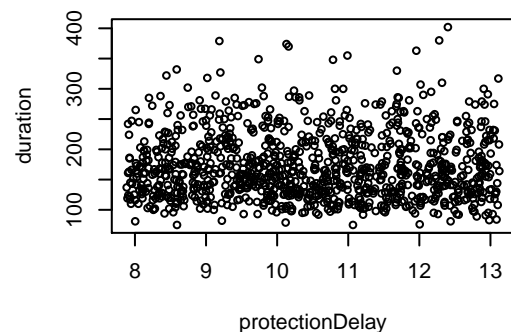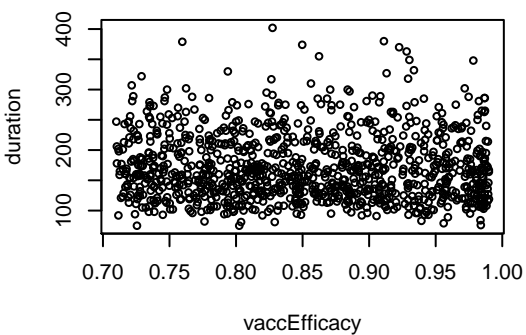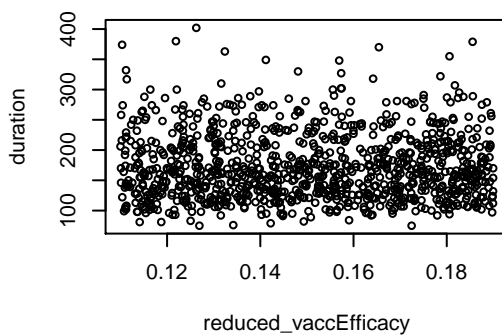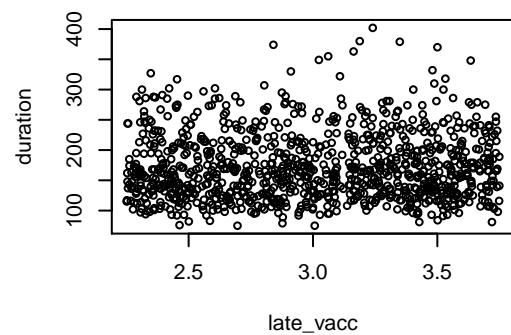

Supplement: pntd.0003876.s011.pdf [file pntd.0003876.s011.pdf]
