# Supplementary material for: Development of a Novel Rabies Simulation Model for Application in a Non-endemic Environment
Source: PubMed Central journal article supplement (PMC4482682; doi:10.1371/journal.pntd.0003876), 2015-06-26

A

incubation period

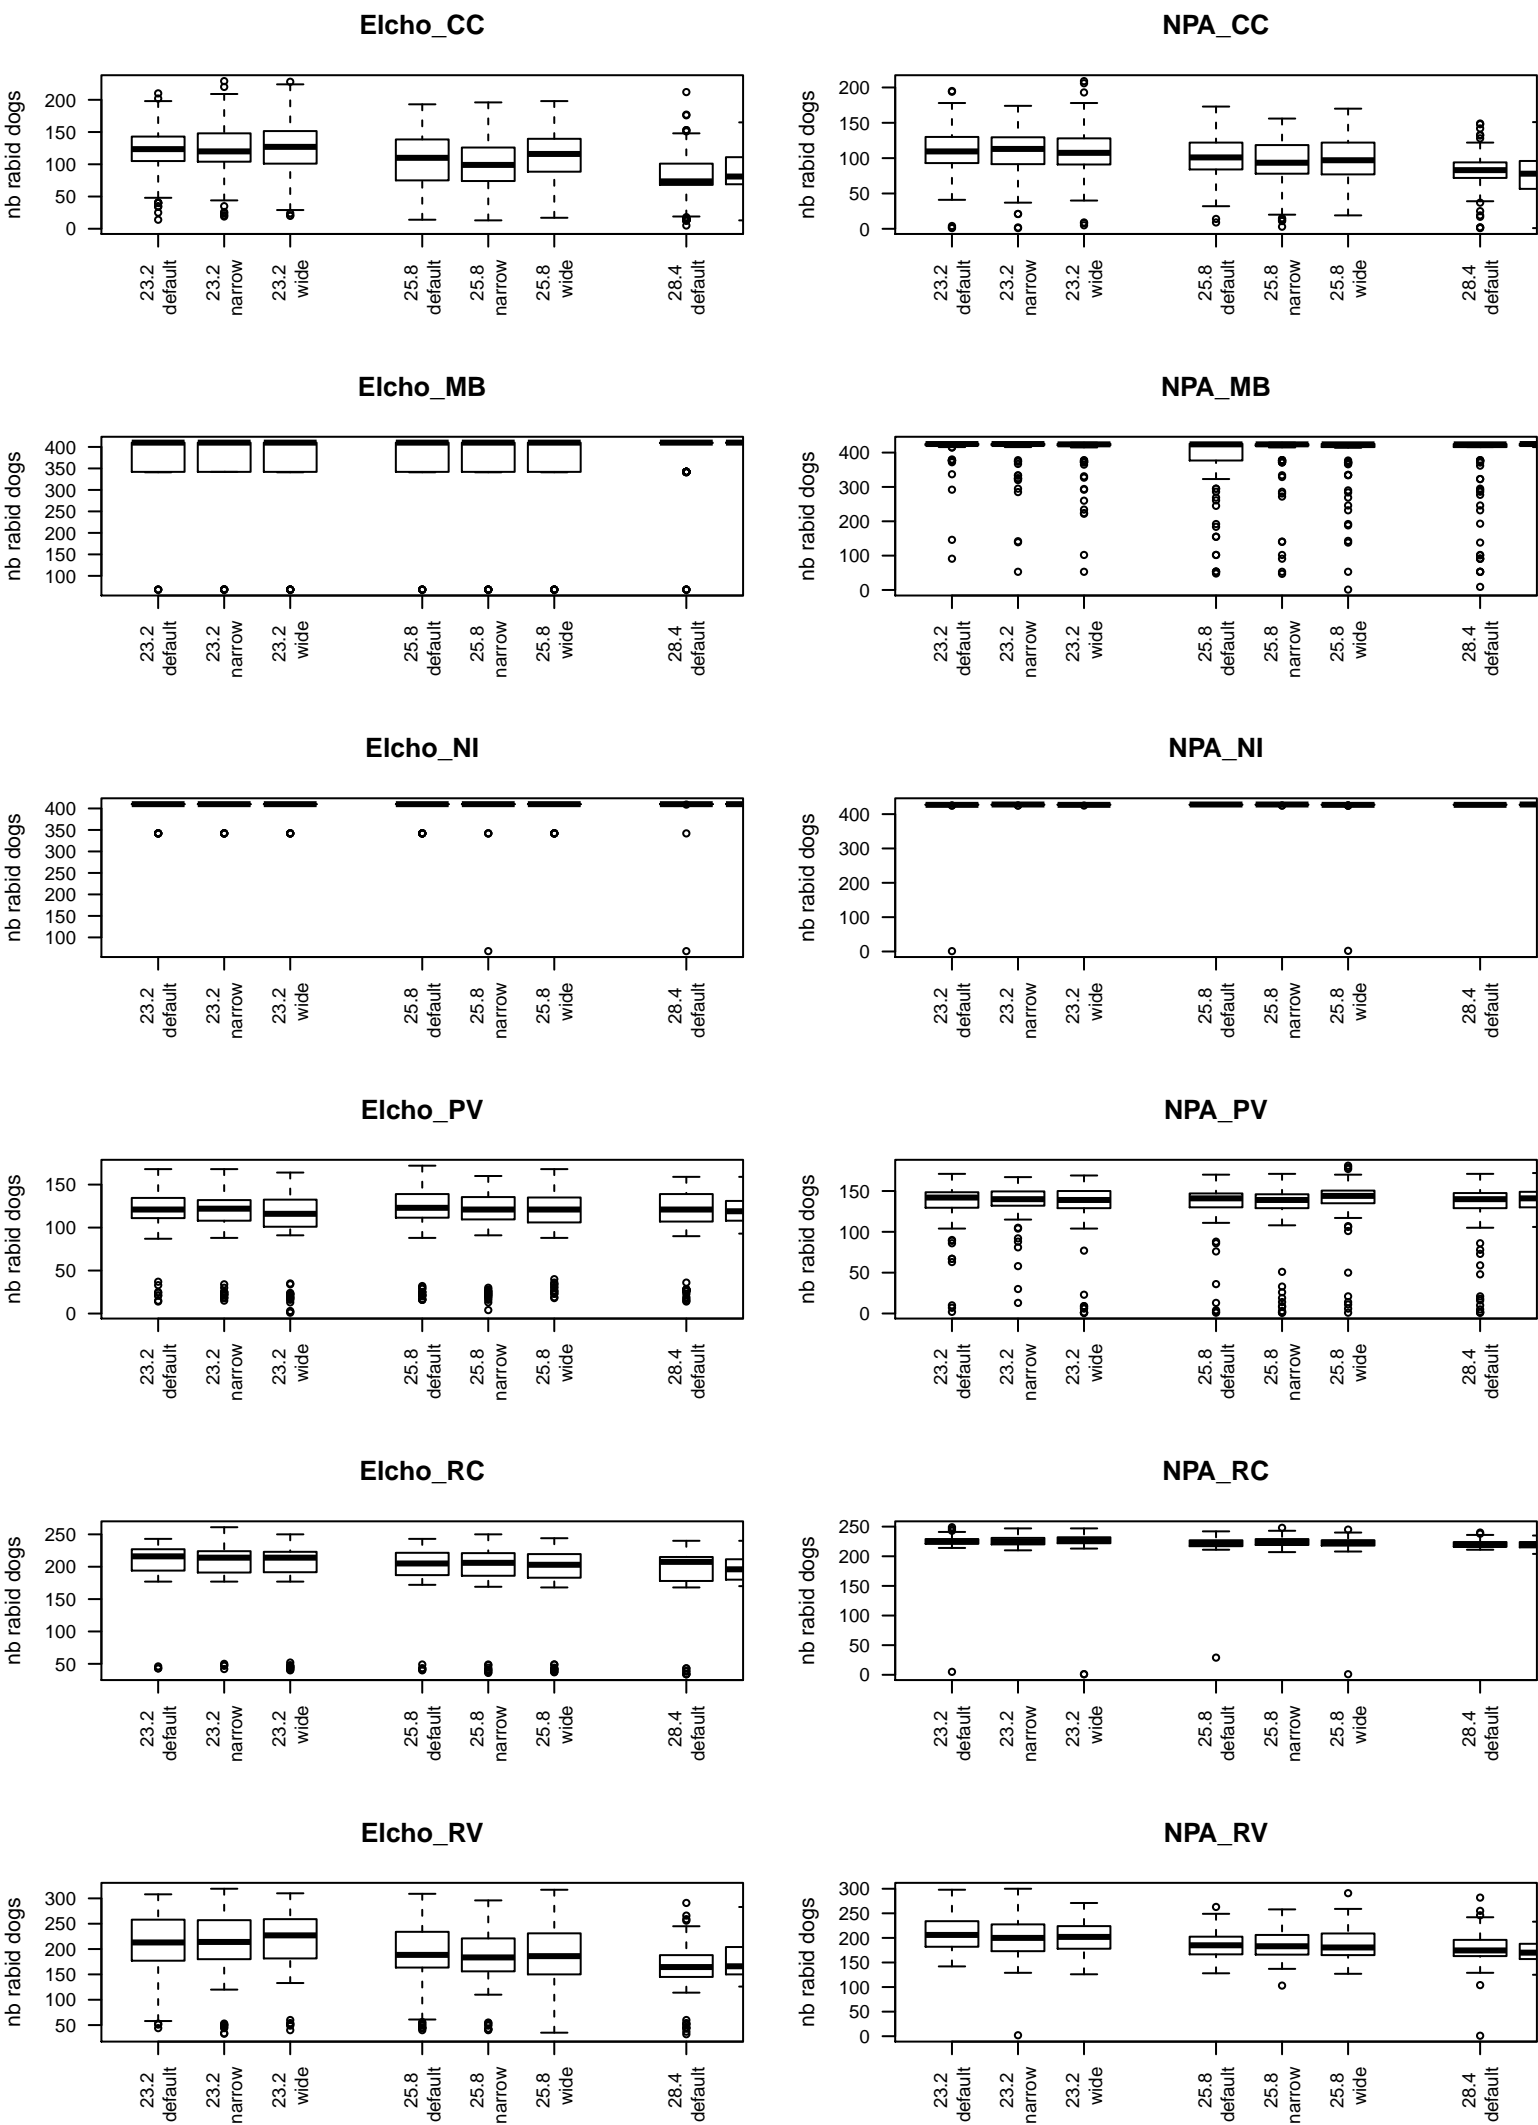

B

incubation period

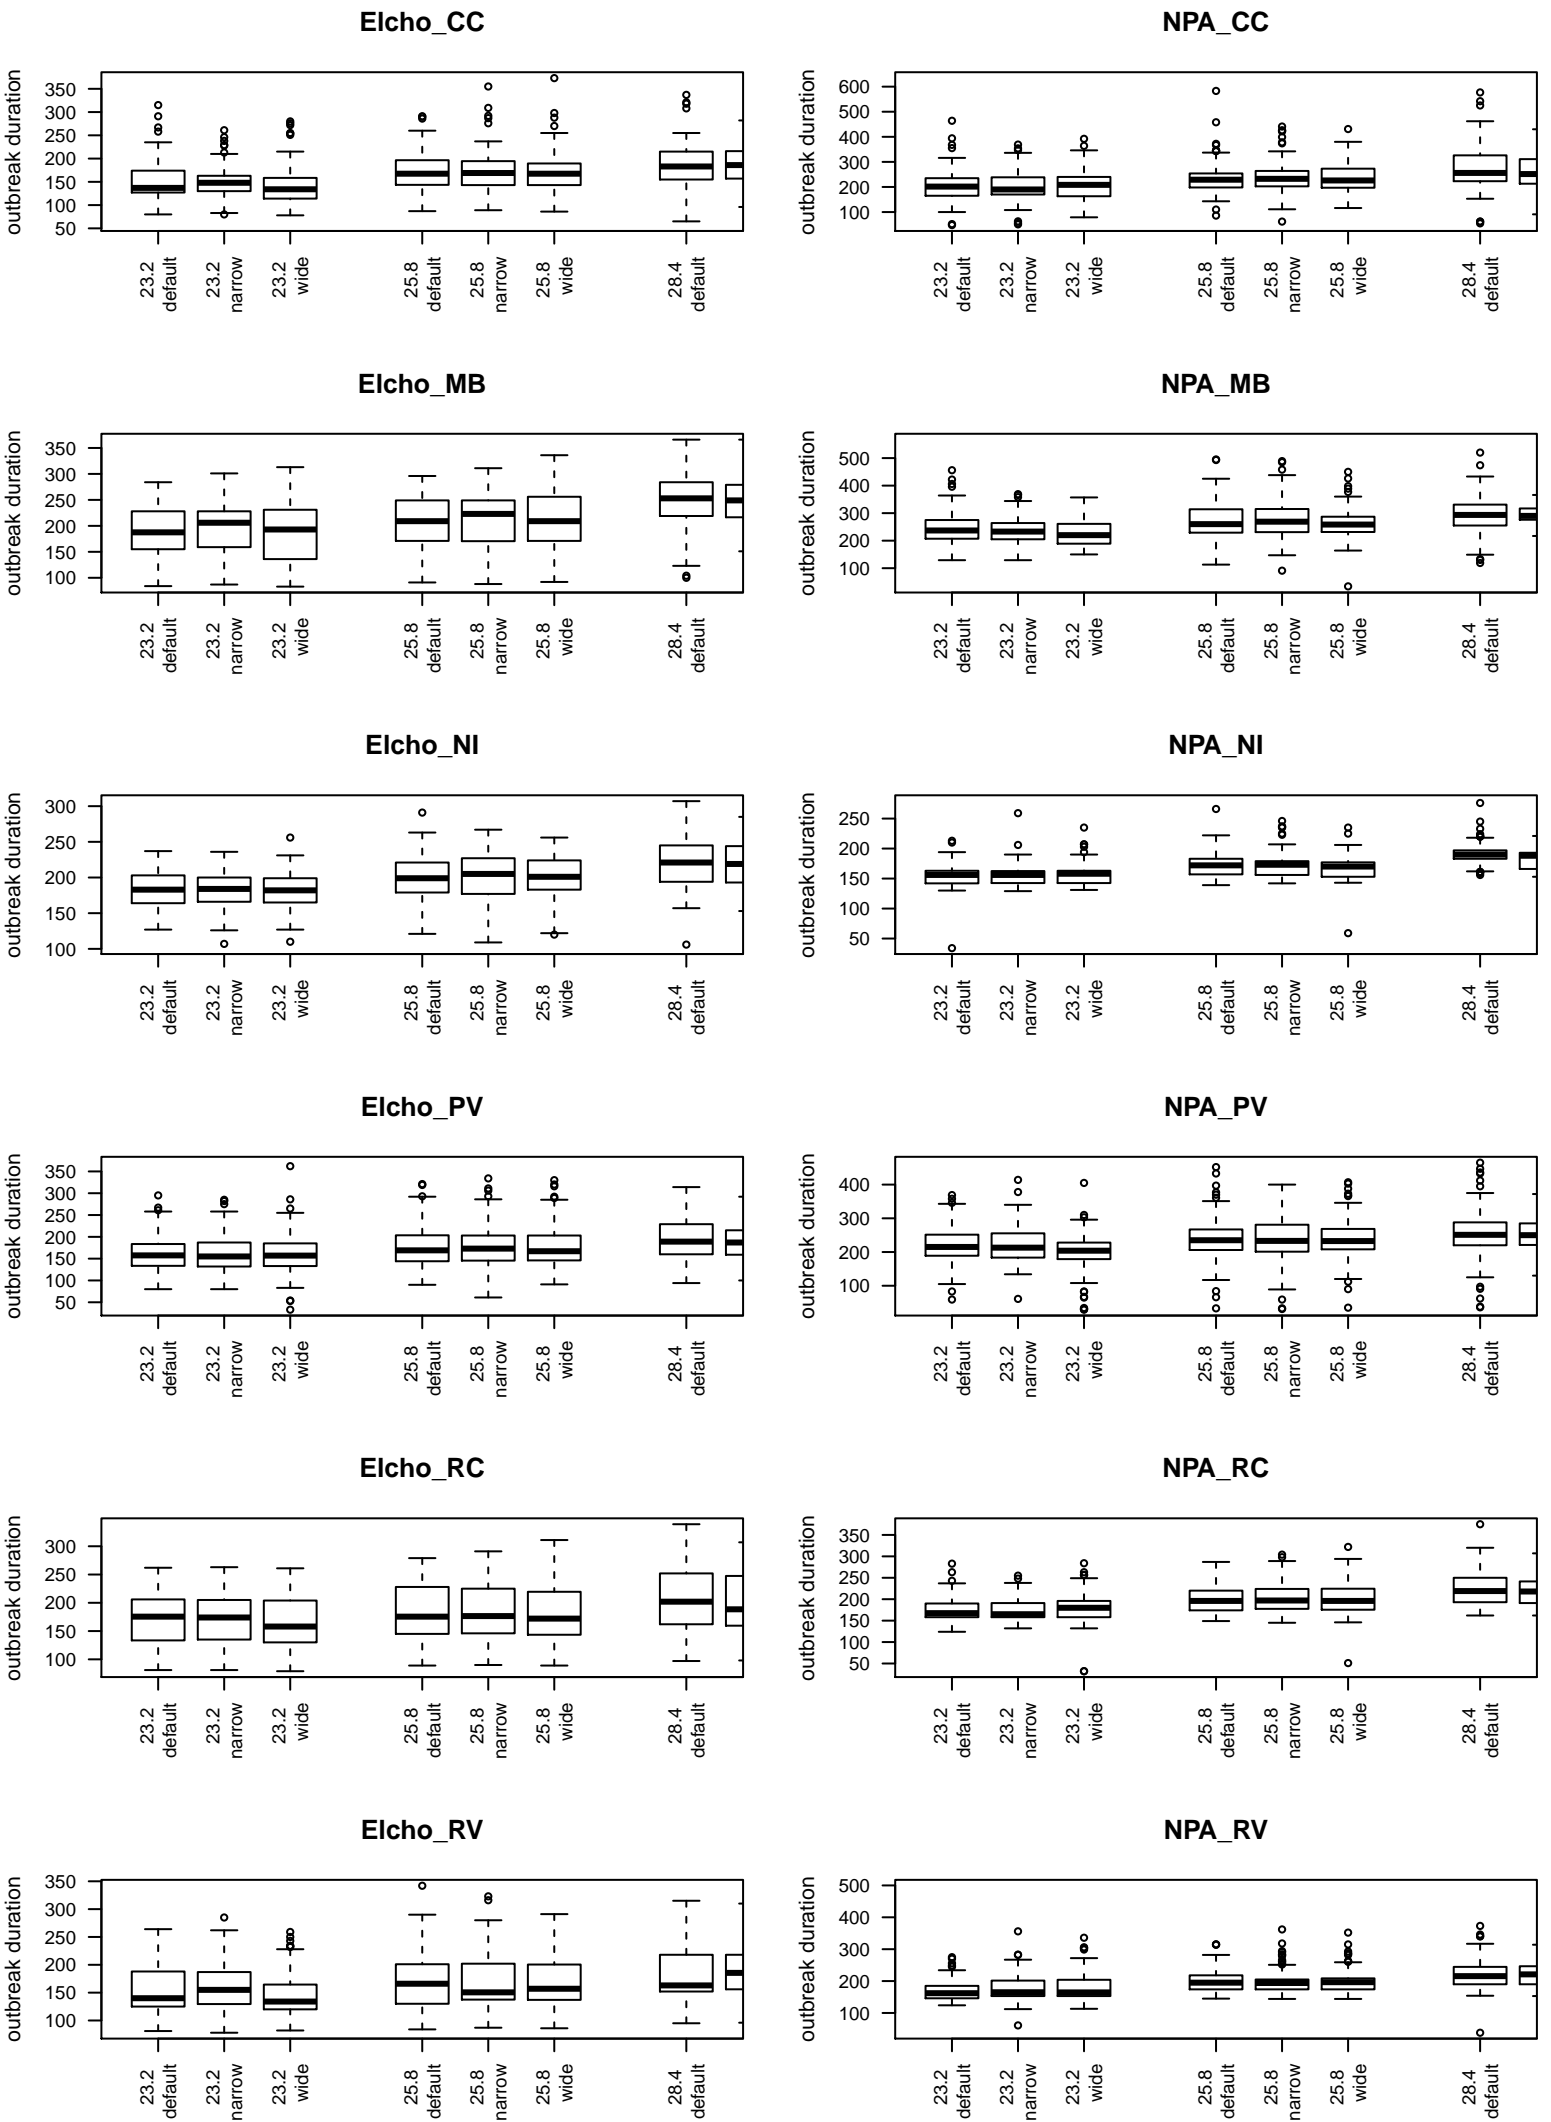

C

## bite prob of contacts between dogs of different households

Elcho\_CC

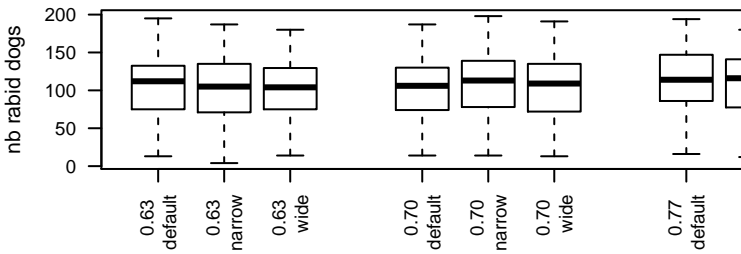

NPA\_CC

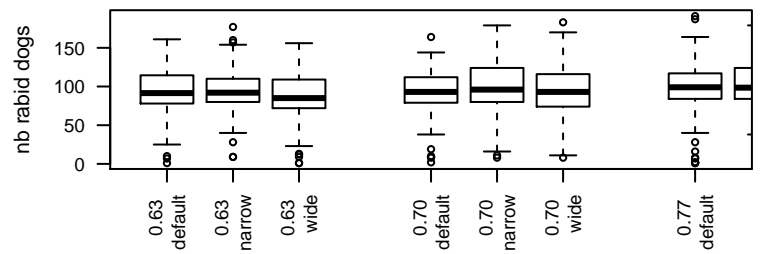

Elcho\_MB

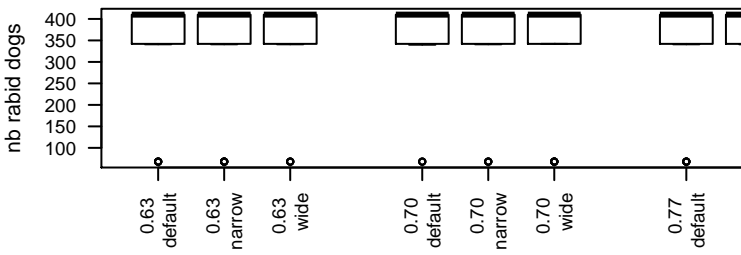

NPA\_MB

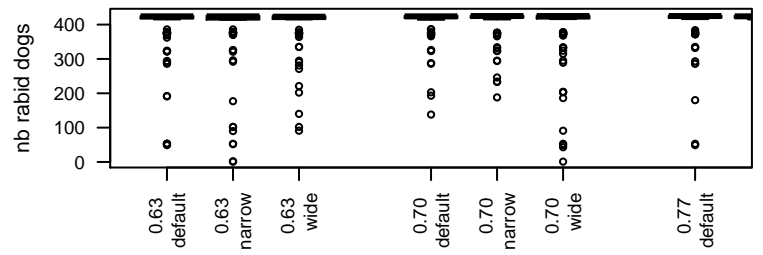

Elcho\_NI

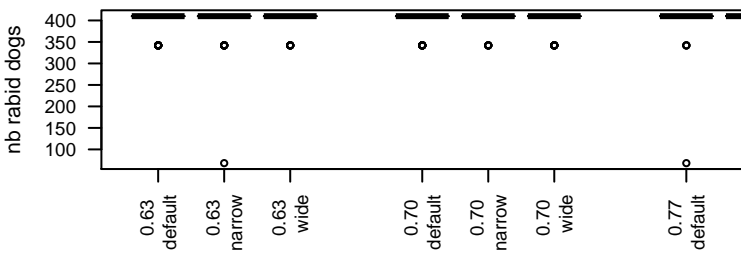

NPA\_NI

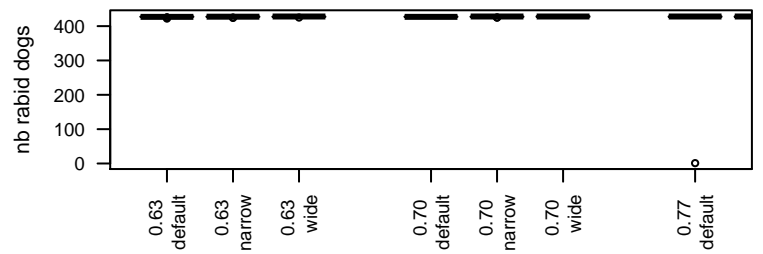

Elcho\_PV

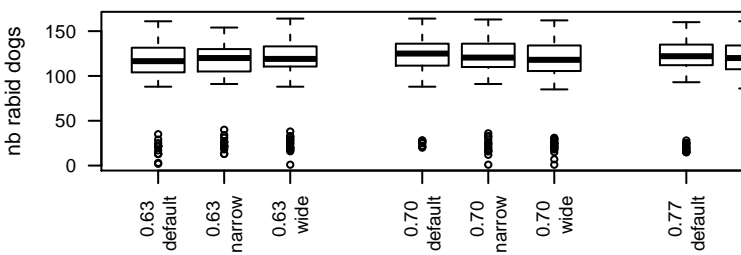

NPA\_PV

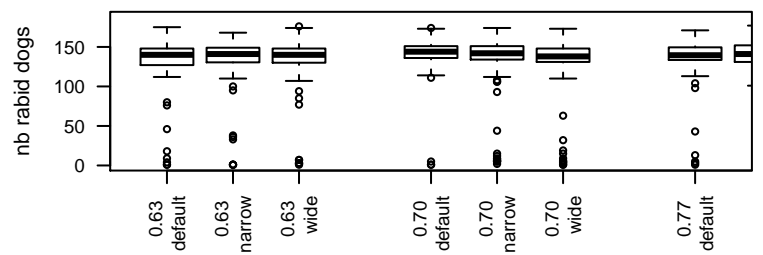

Elcho\_RC

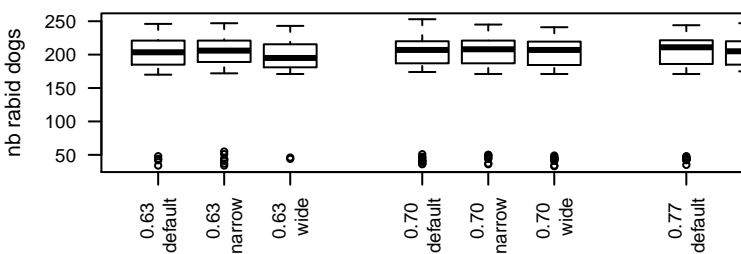

NPA\_RC

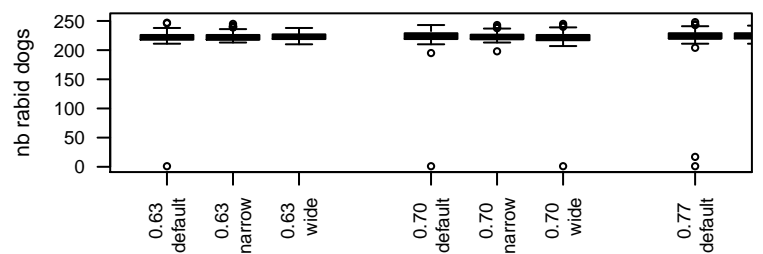

Elcho\_RV

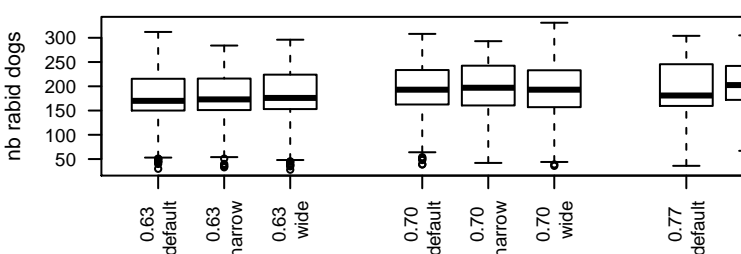

NPA\_RV

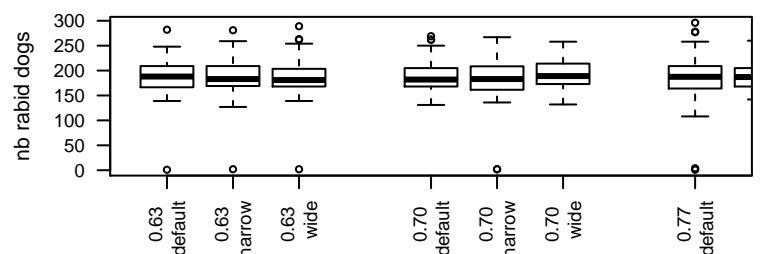

D

## bite prob of contacts between dogs of different households

Elcho\_CC

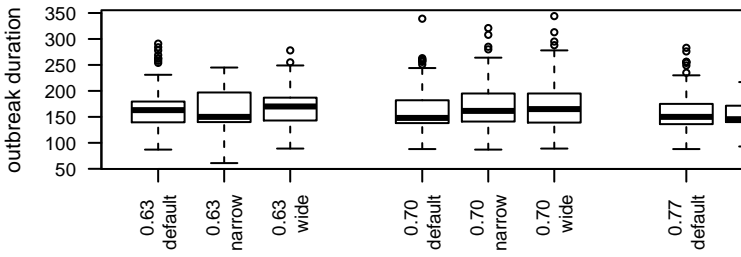

NPA\_CC

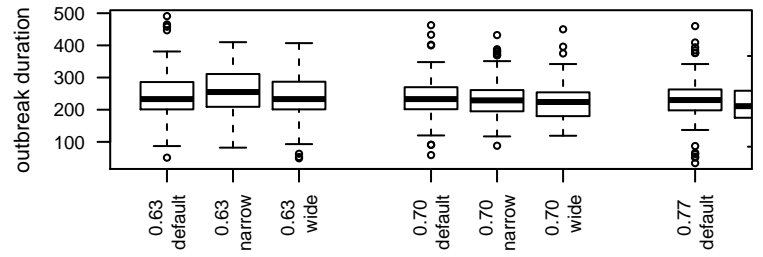

Elcho\_MB

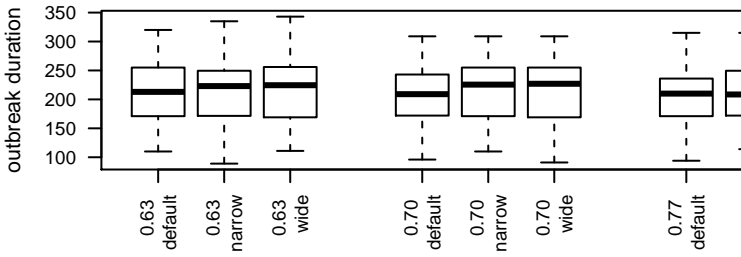

NPA\_MB

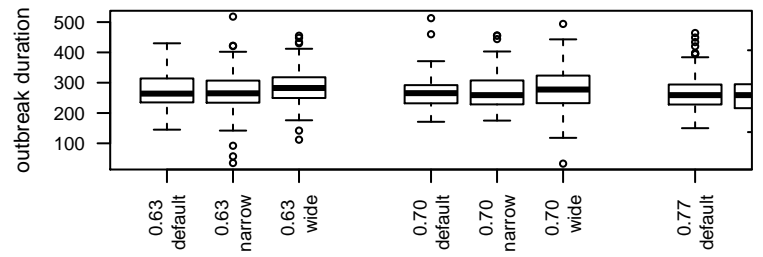

Elcho\_NI

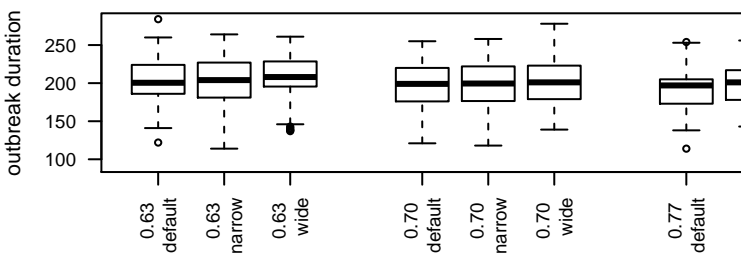

NPA\_NI

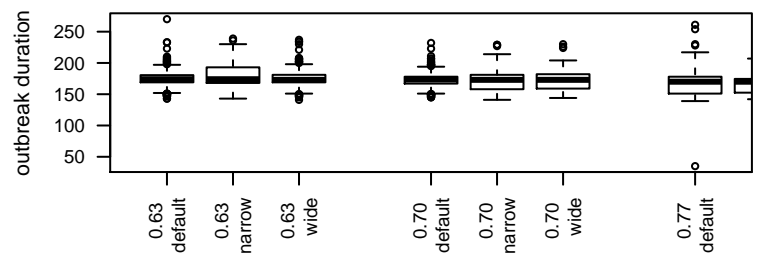

Elcho\_PV

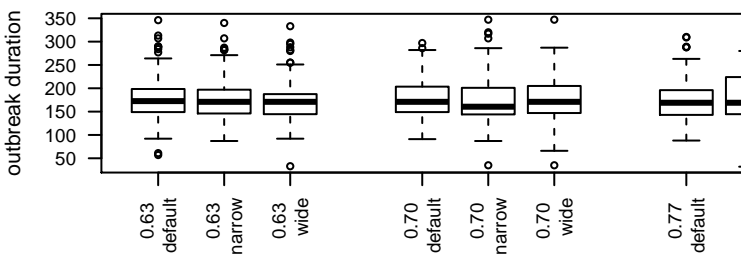

NPA\_PV

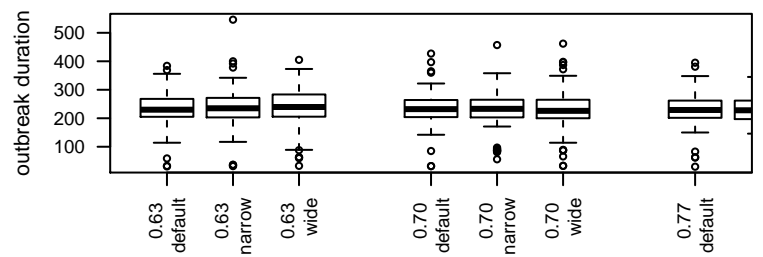

Elcho\_RC

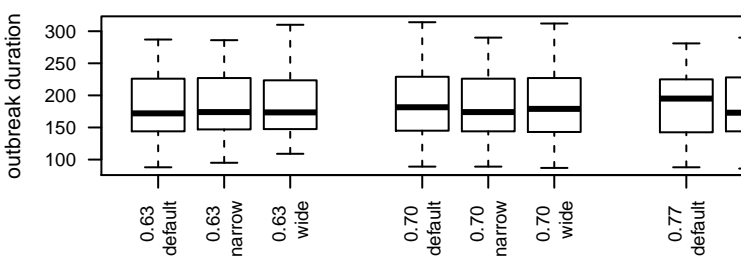

NPA\_RC

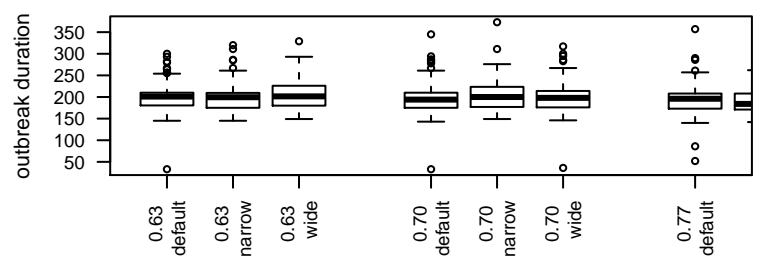

Elcho\_RV

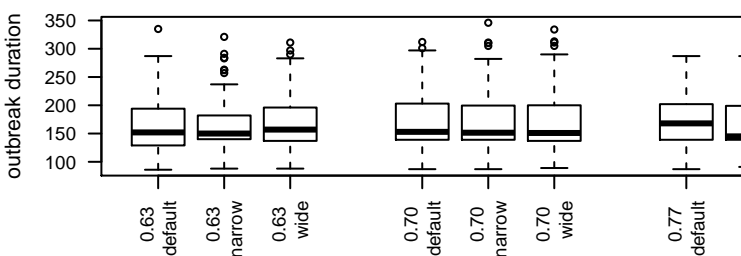

NPA\_RV

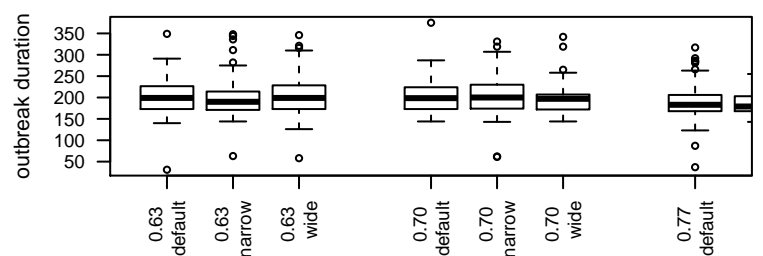



F

## rabies transmission prob given a bite

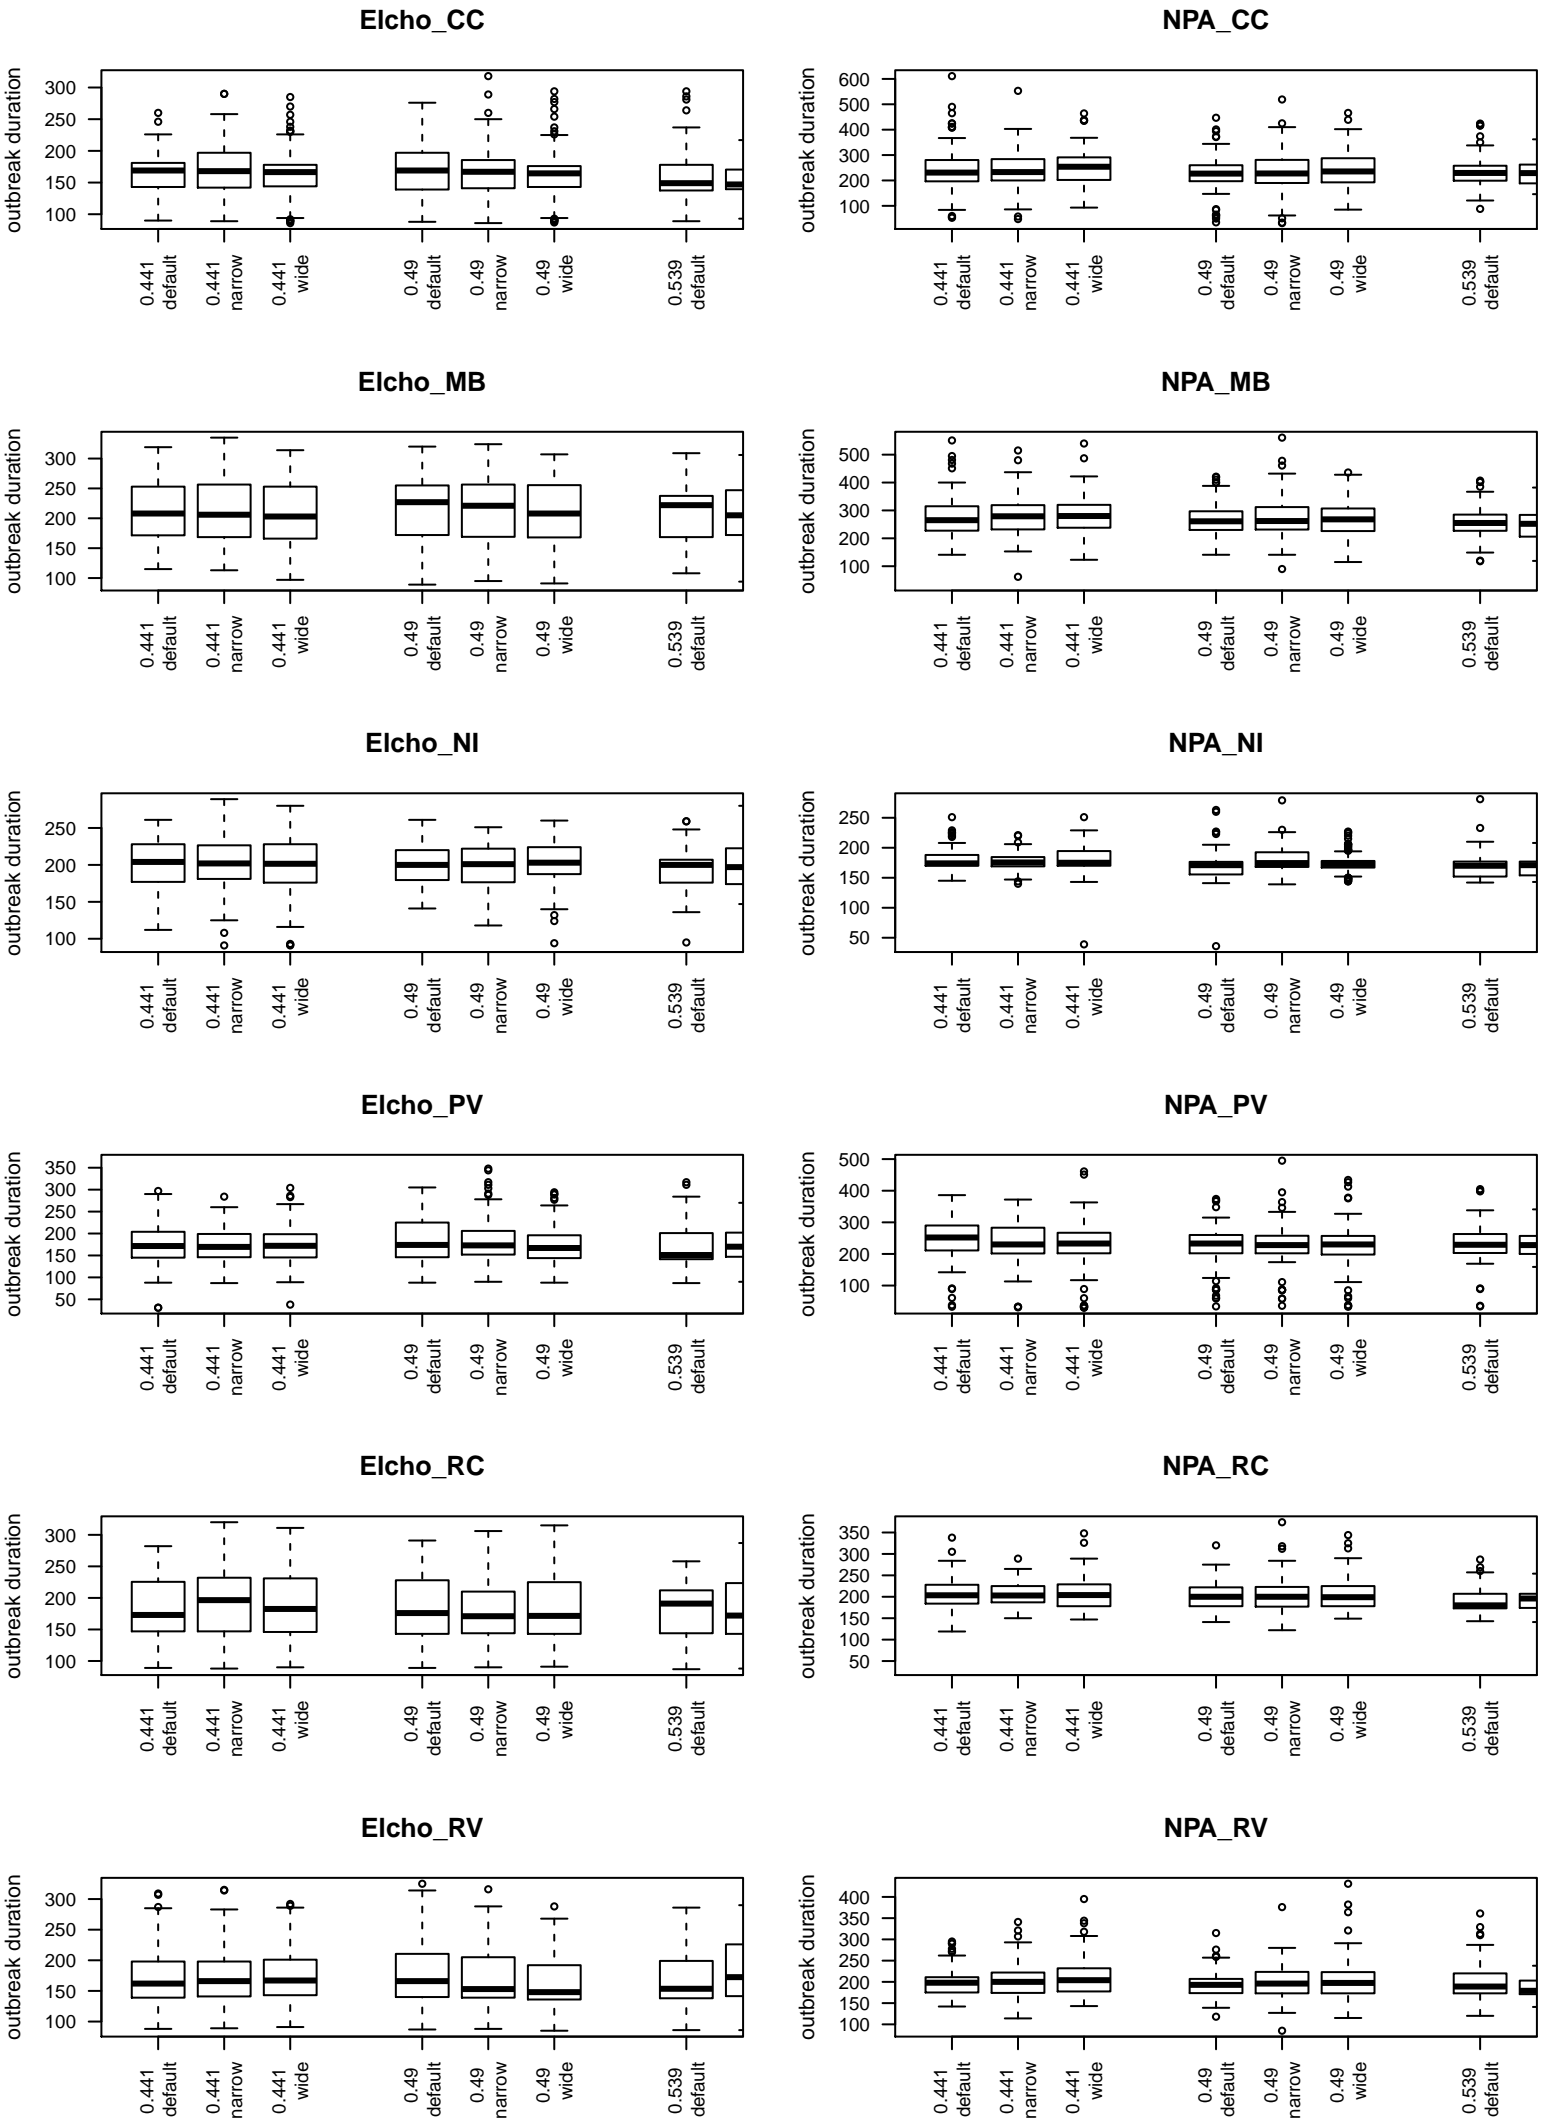

G

## vaccine efficacy

Elcho\_PV

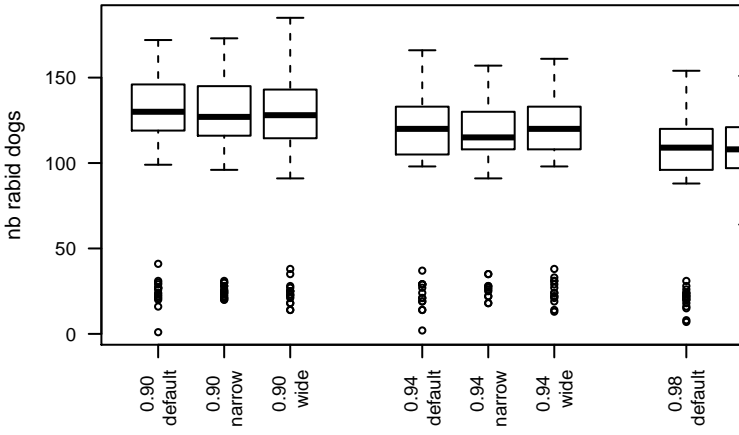

NPA\_PV

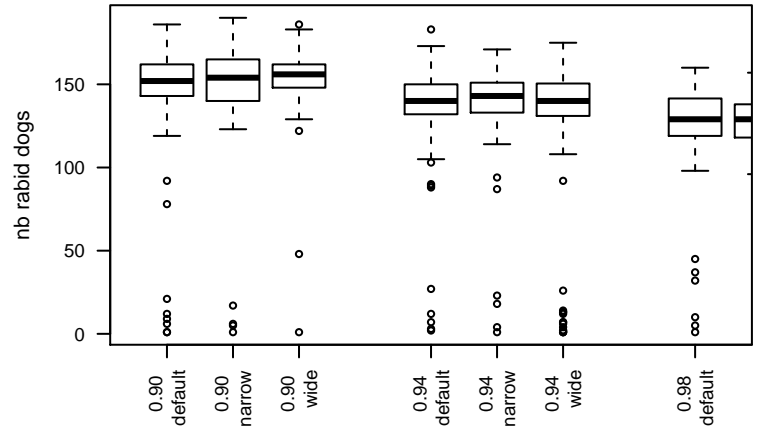

Elcho\_RV

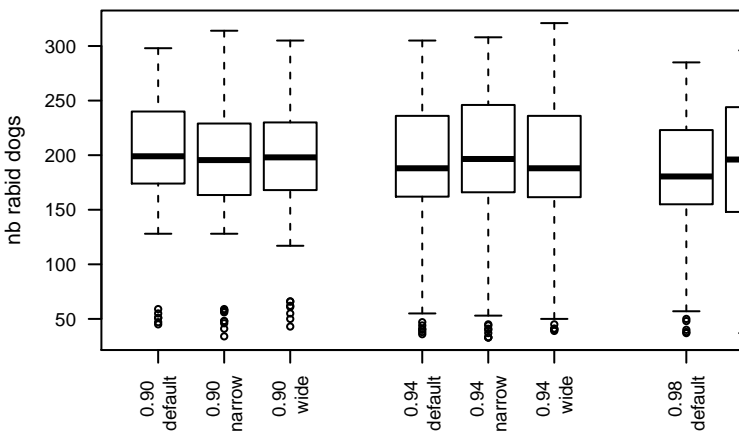

NPA\_RV

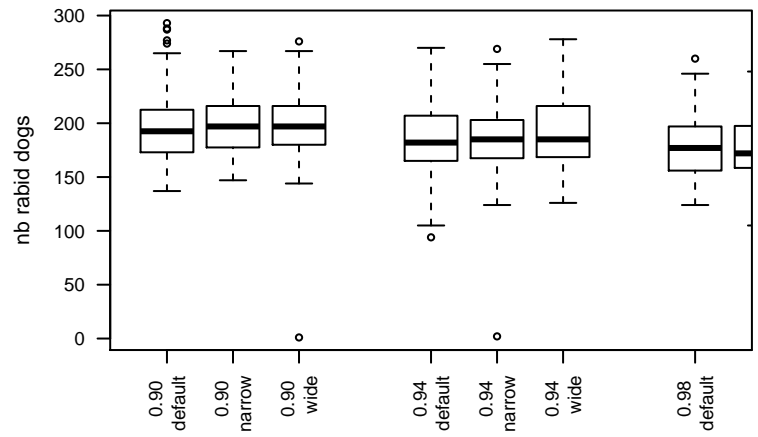

Elcho\_PV

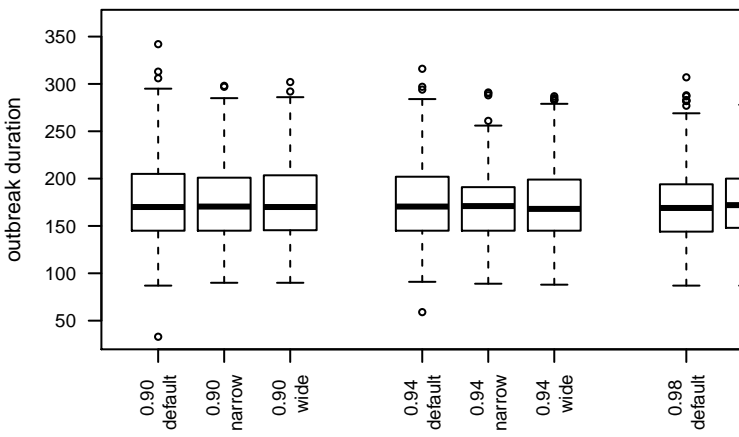

NPA\_PV

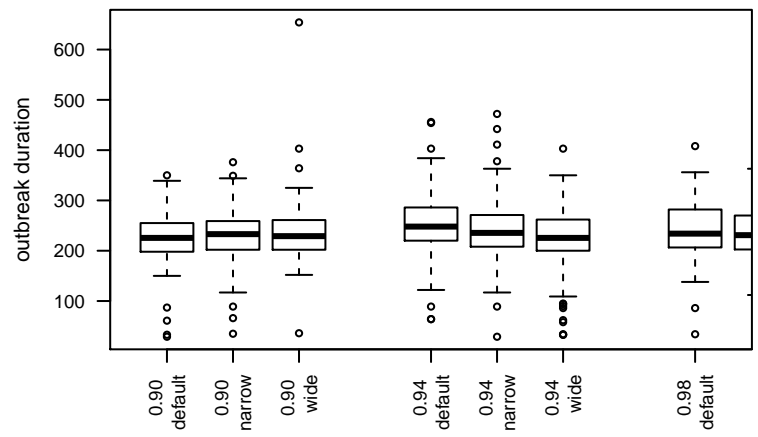

Elcho\_RV

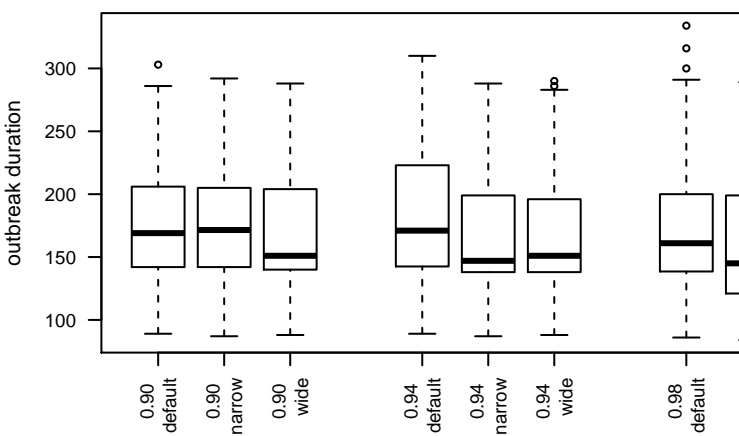

NPA\_RV

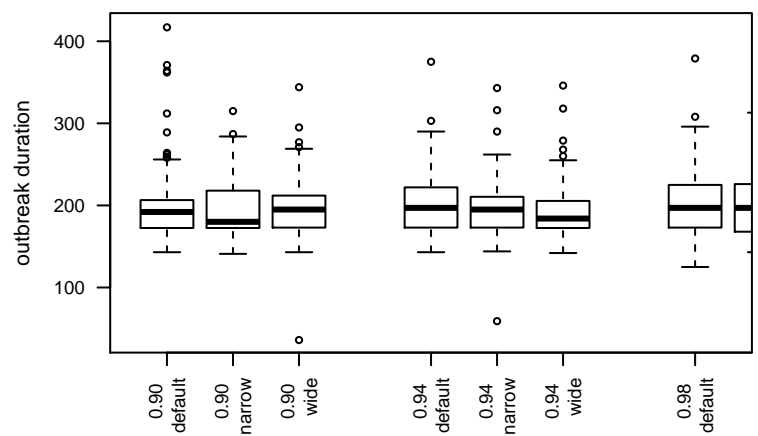

Supplement: pntd.0003876.s012.pdf [file pntd.0003876.s012.pdf]
