# Supplementary material for: Development of a Novel Rabies Simulation Model for Application in a Non-endemic Environment
Source: PubMed Central journal article supplement (PMC4482682; doi:10.1371/journal.pntd.0003876), 2015-06-26

A

NPA\_CC

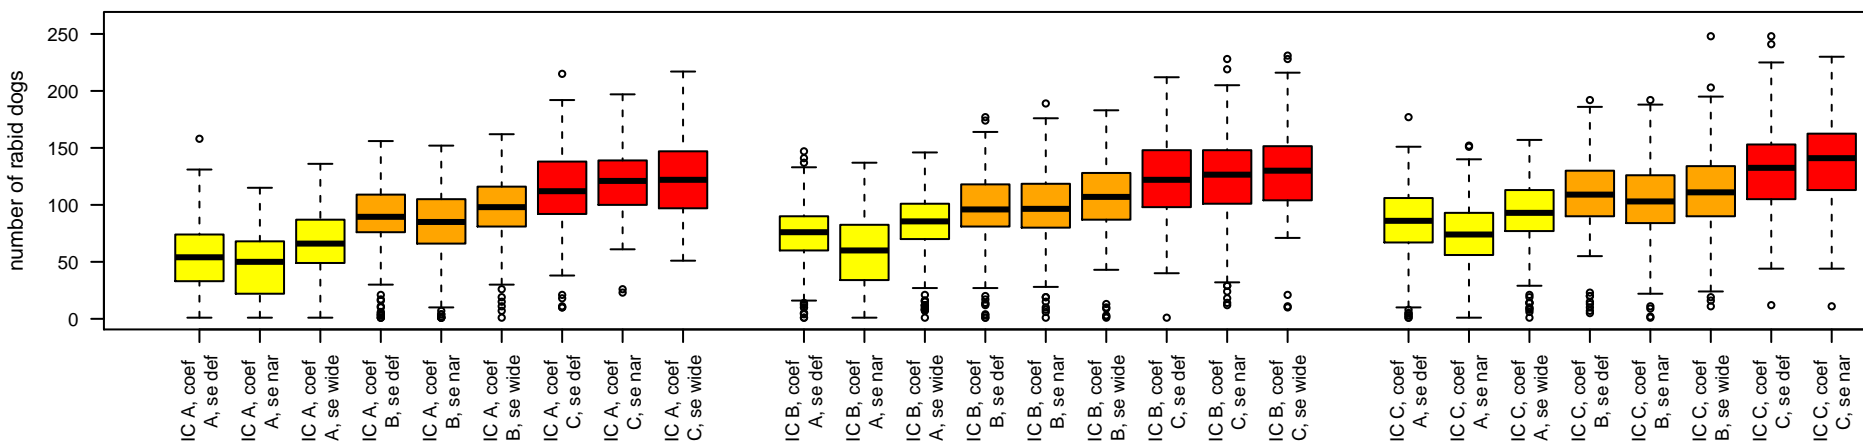

NPA\_MB

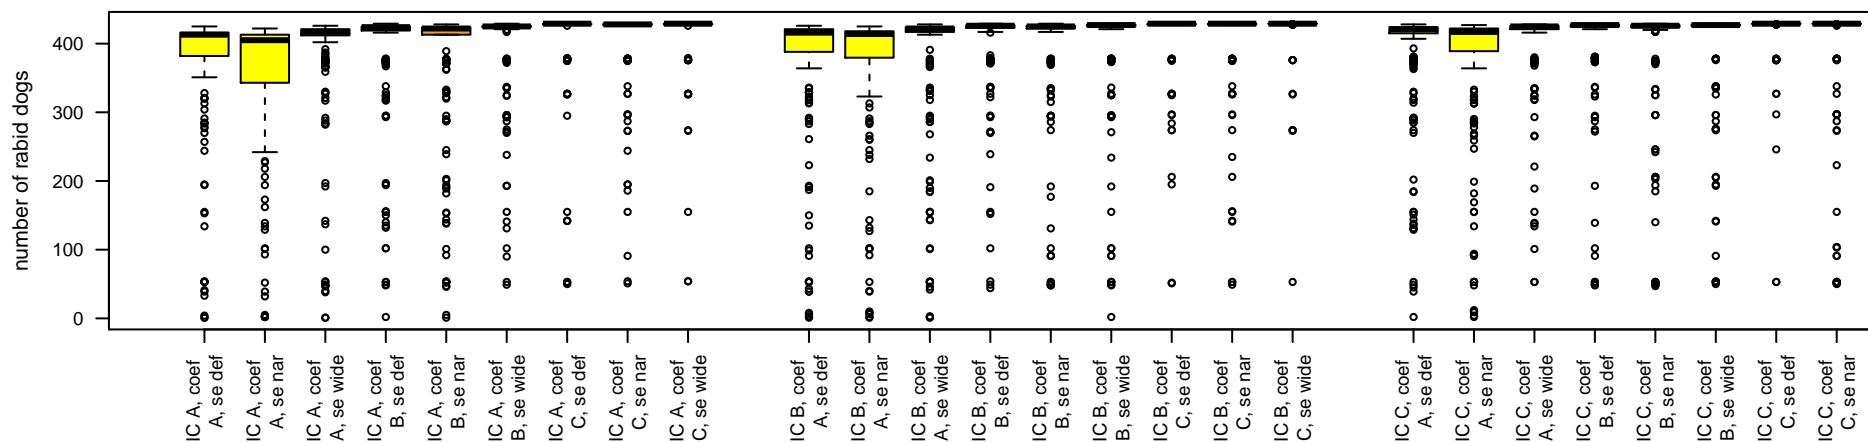

NPA\_NI

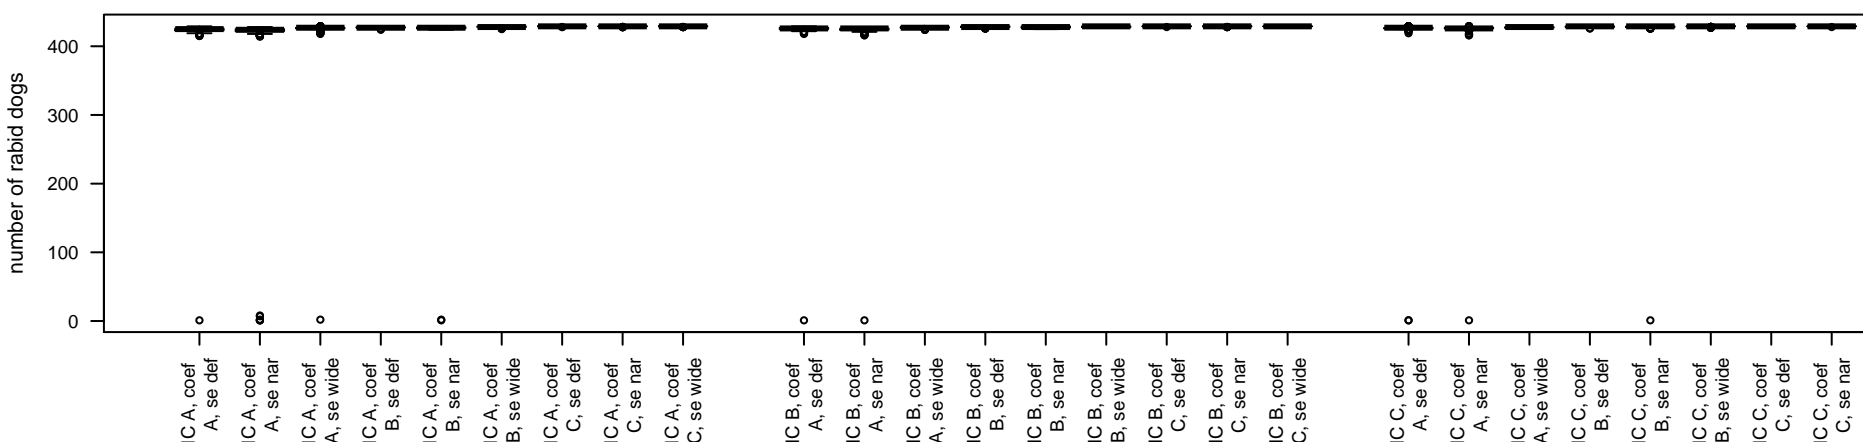

NPA\_PV

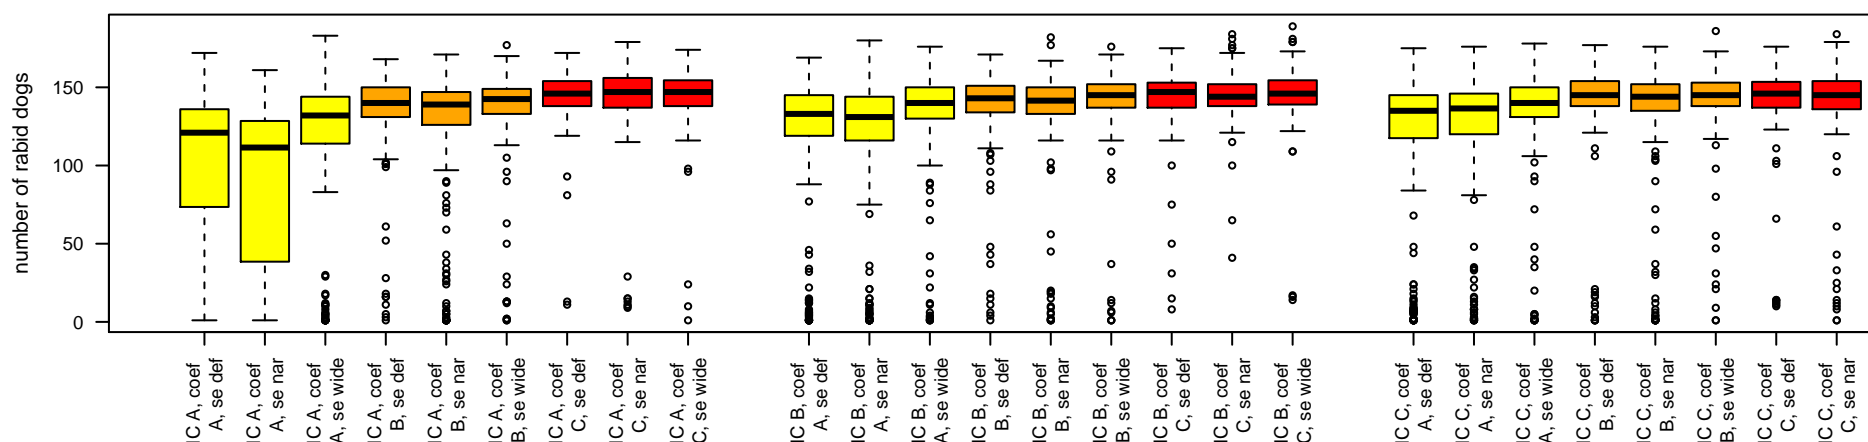

NPA\_RC

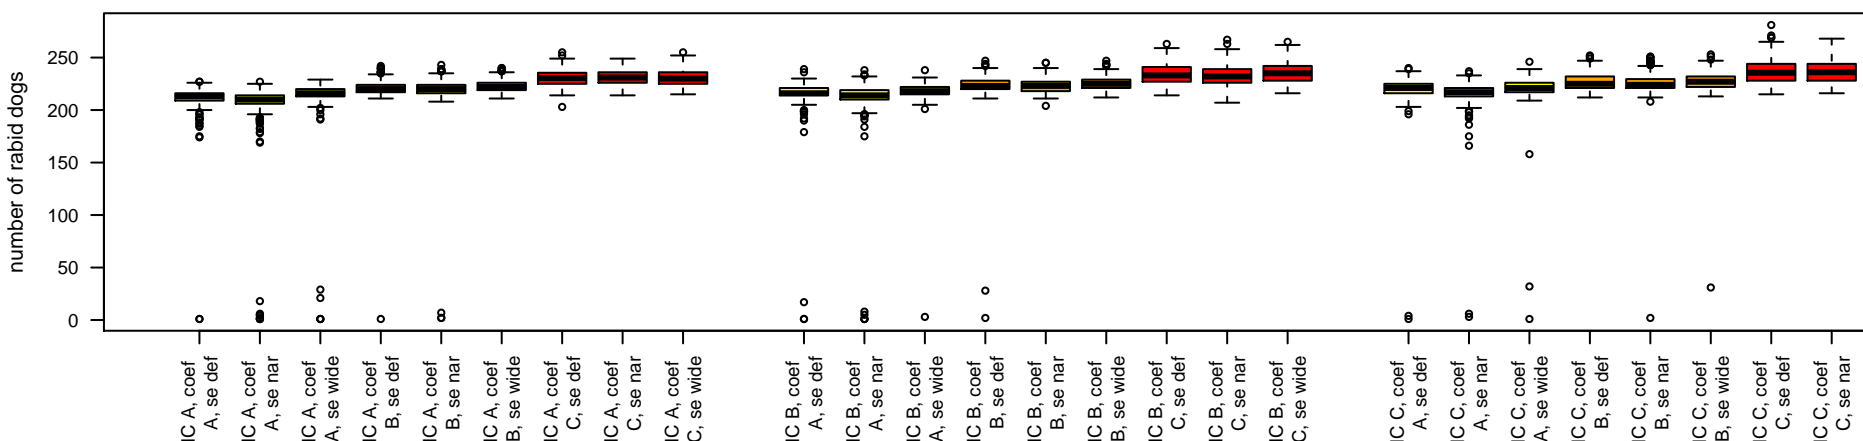

NPA\_RV

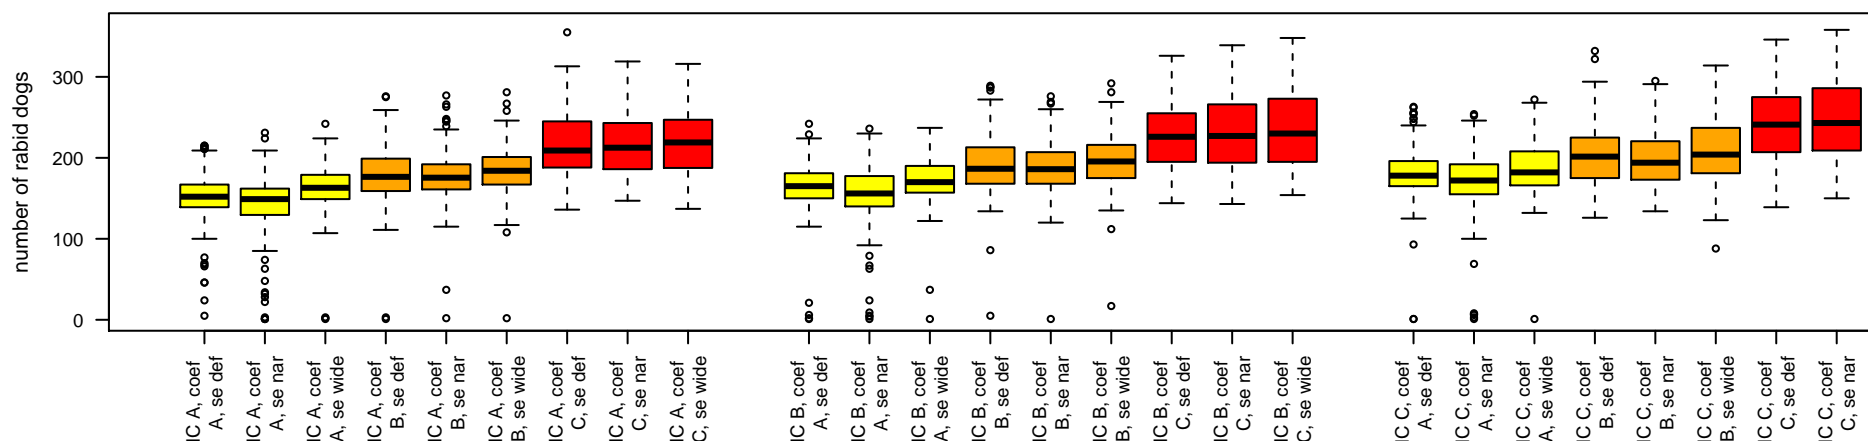

B

Elcho\_CC

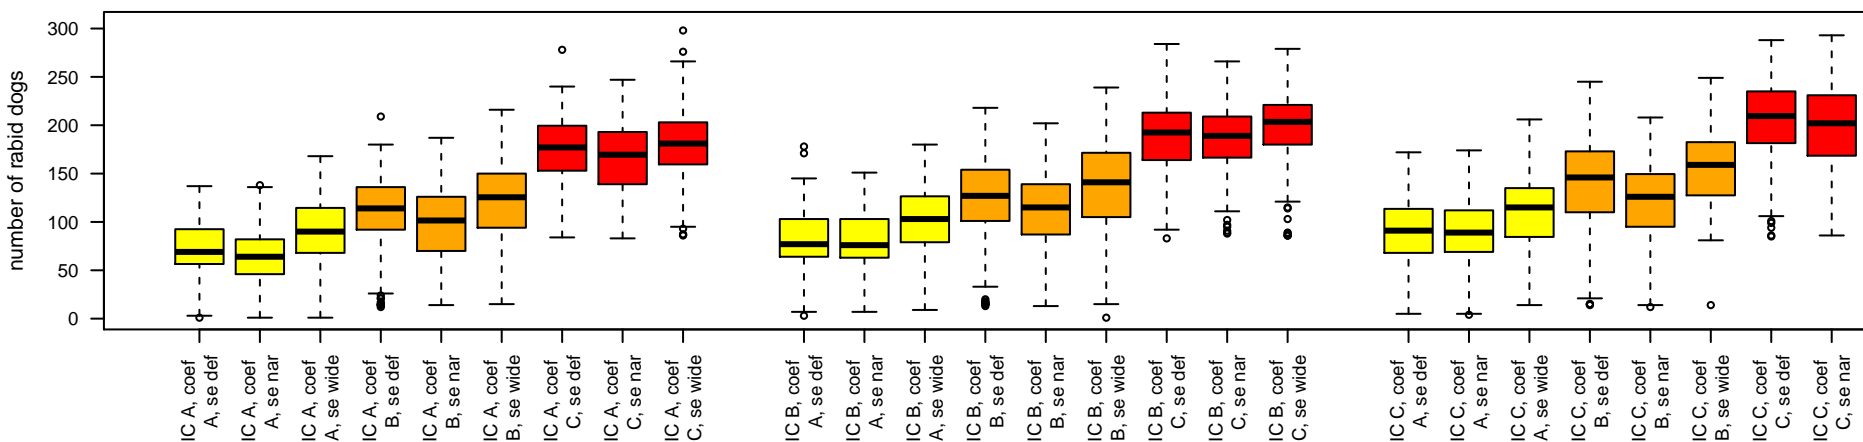

Elcho\_MB

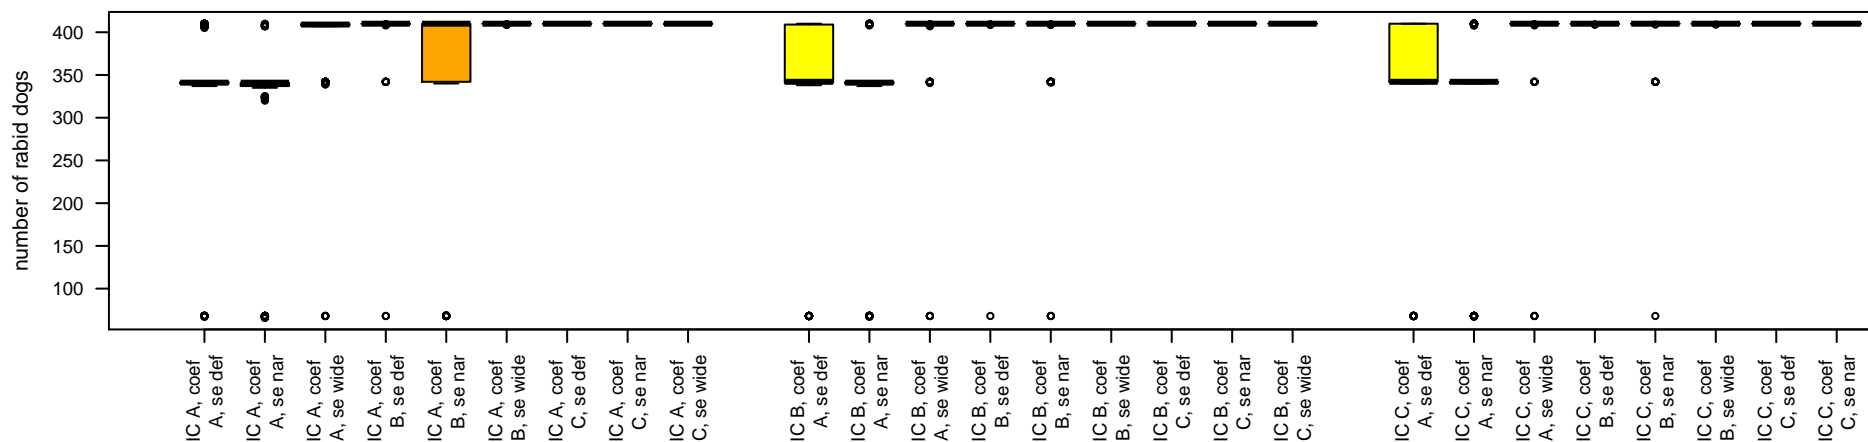

Elcho\_NI

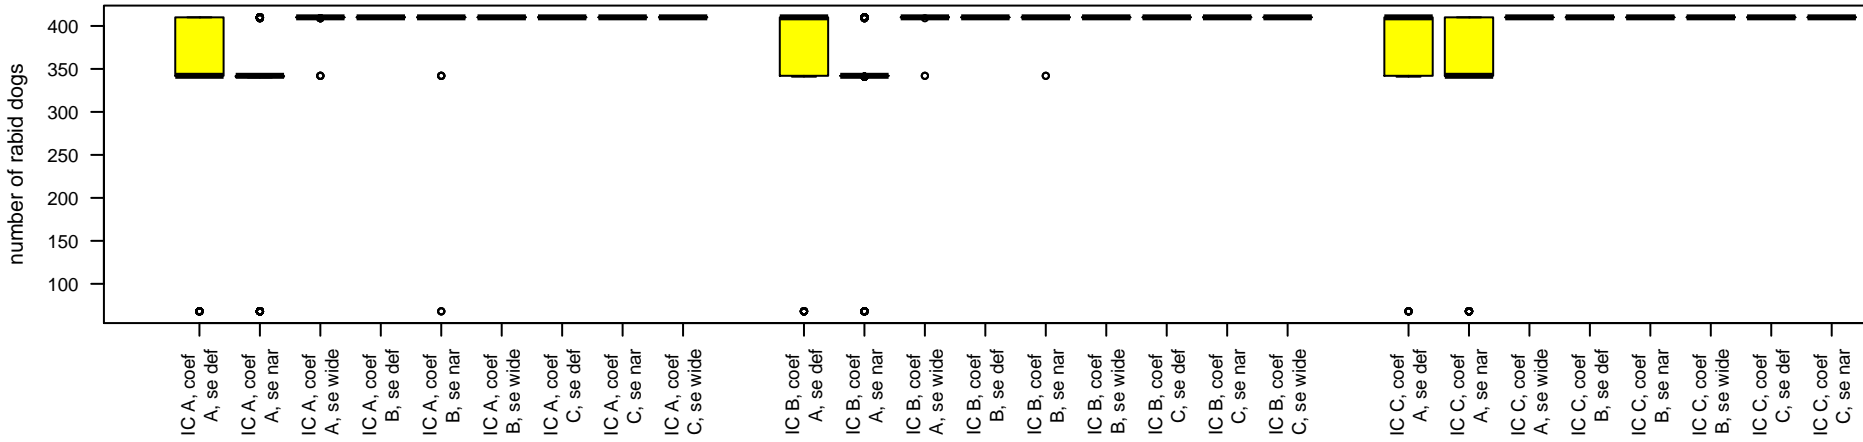

Elcho\_PV

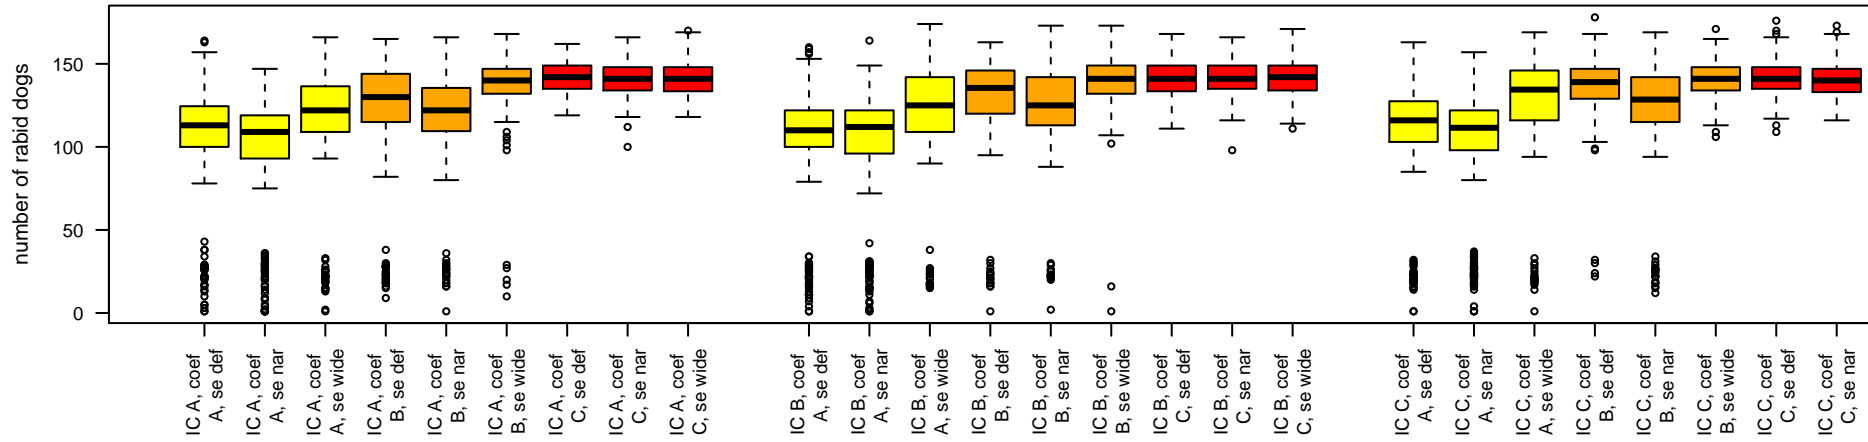

Elcho\_RC

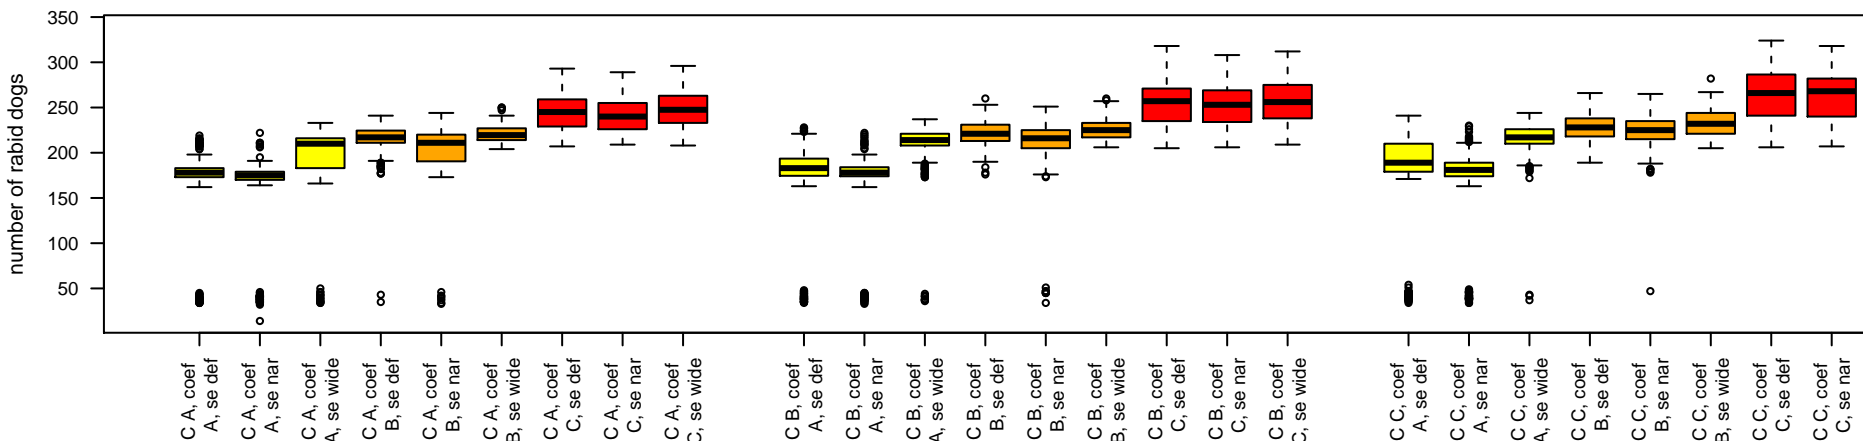

Elcho\_RV

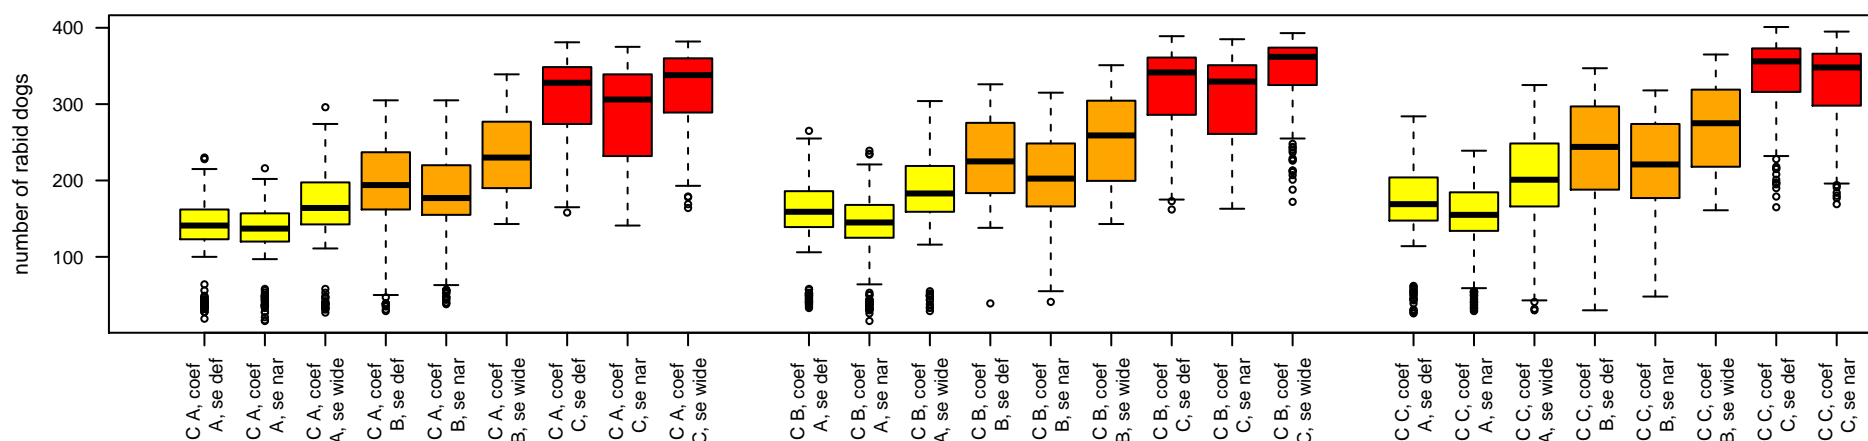



D

Elcho\_CC

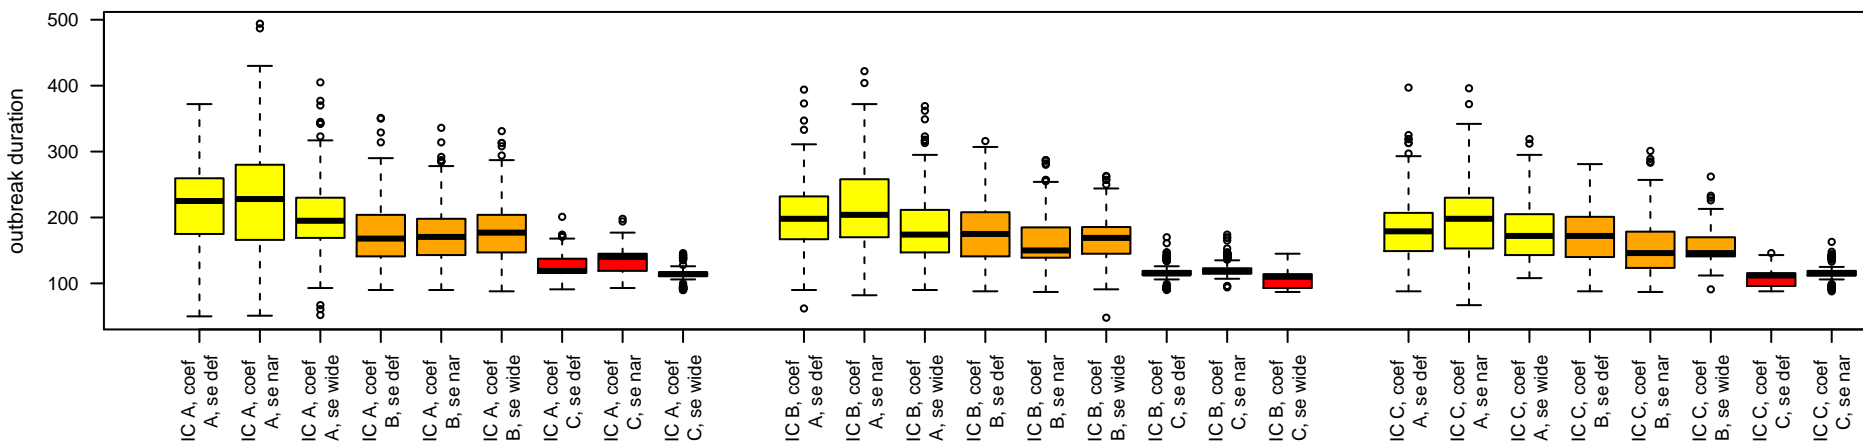

Elcho\_MB

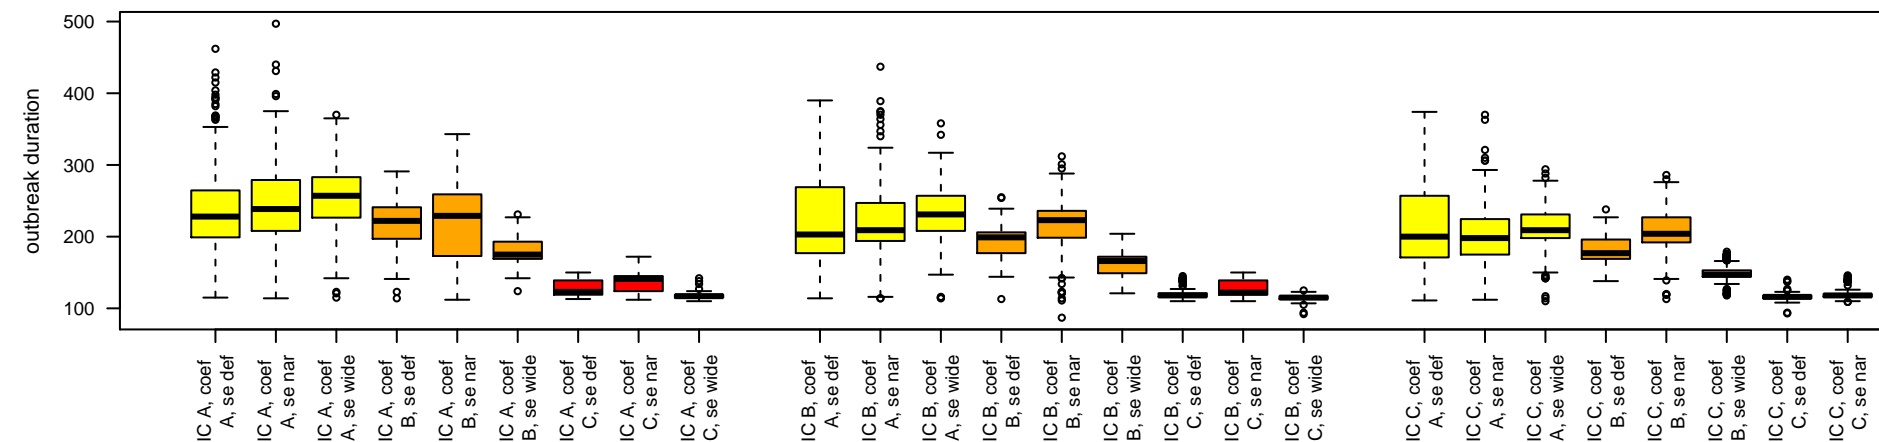

Elcho\_NI

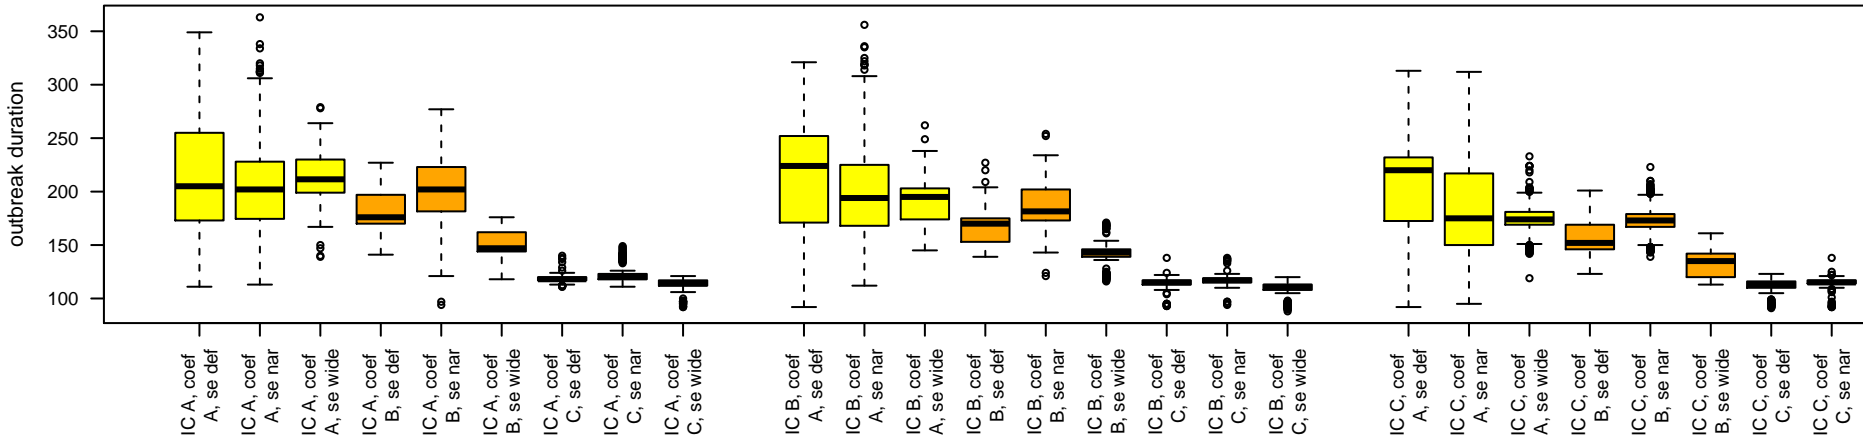

Elcho\_PV

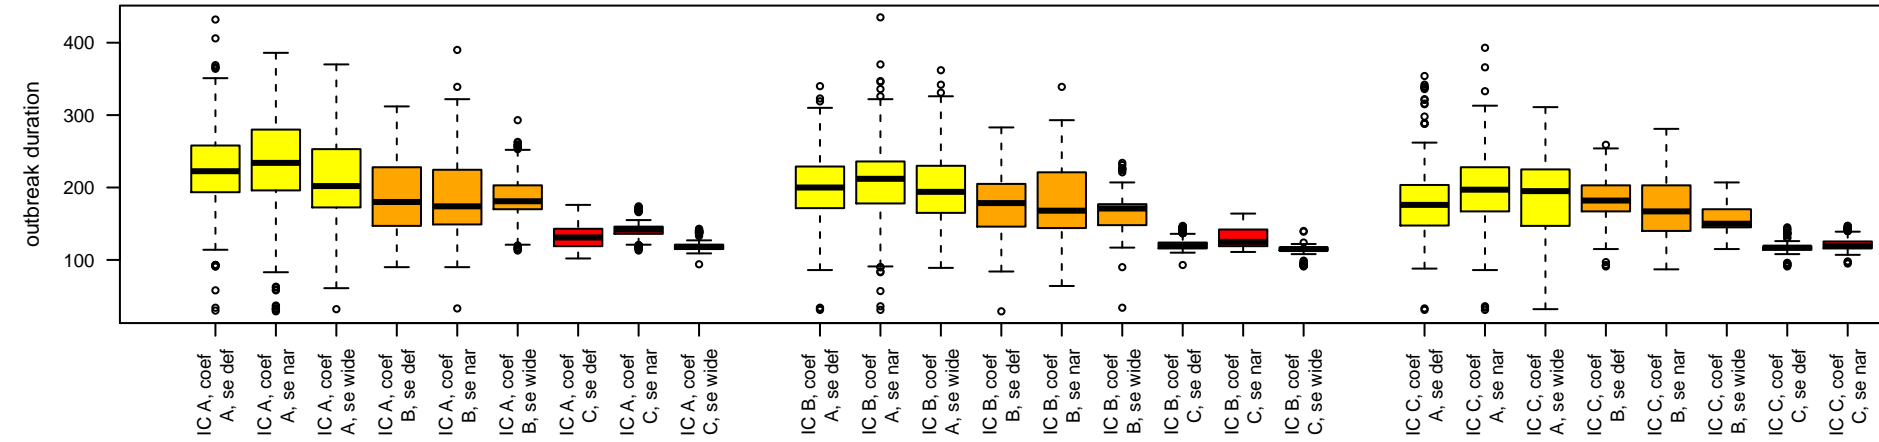

Elcho\_RC

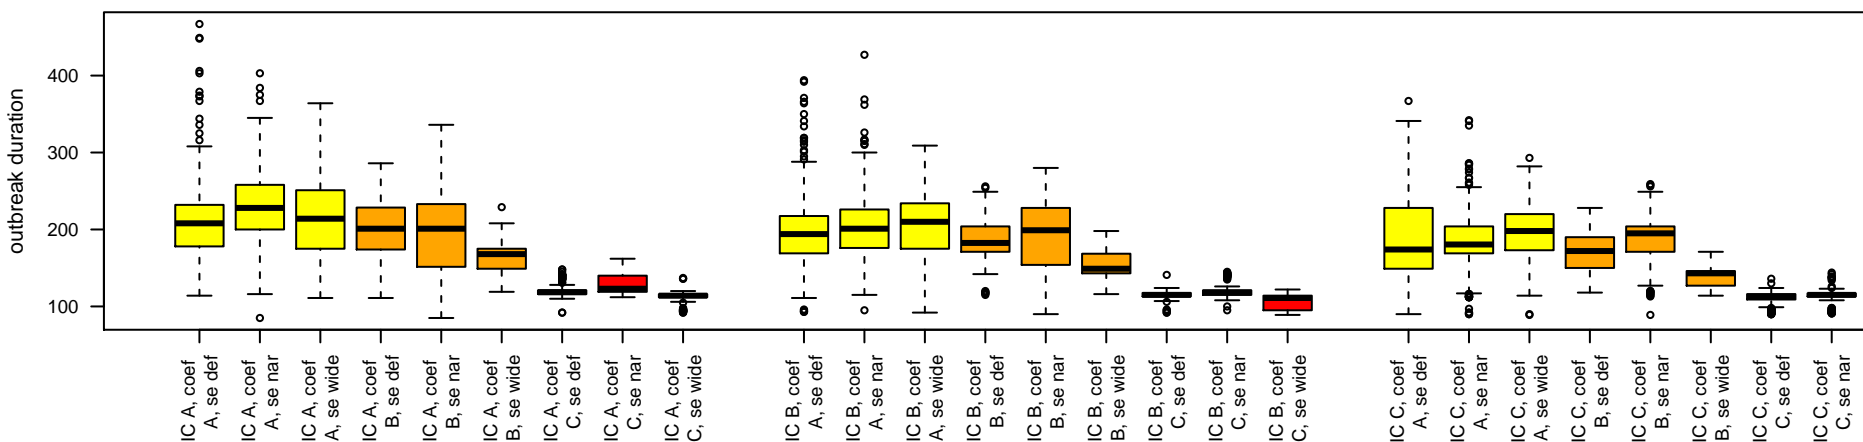

Elcho\_RV

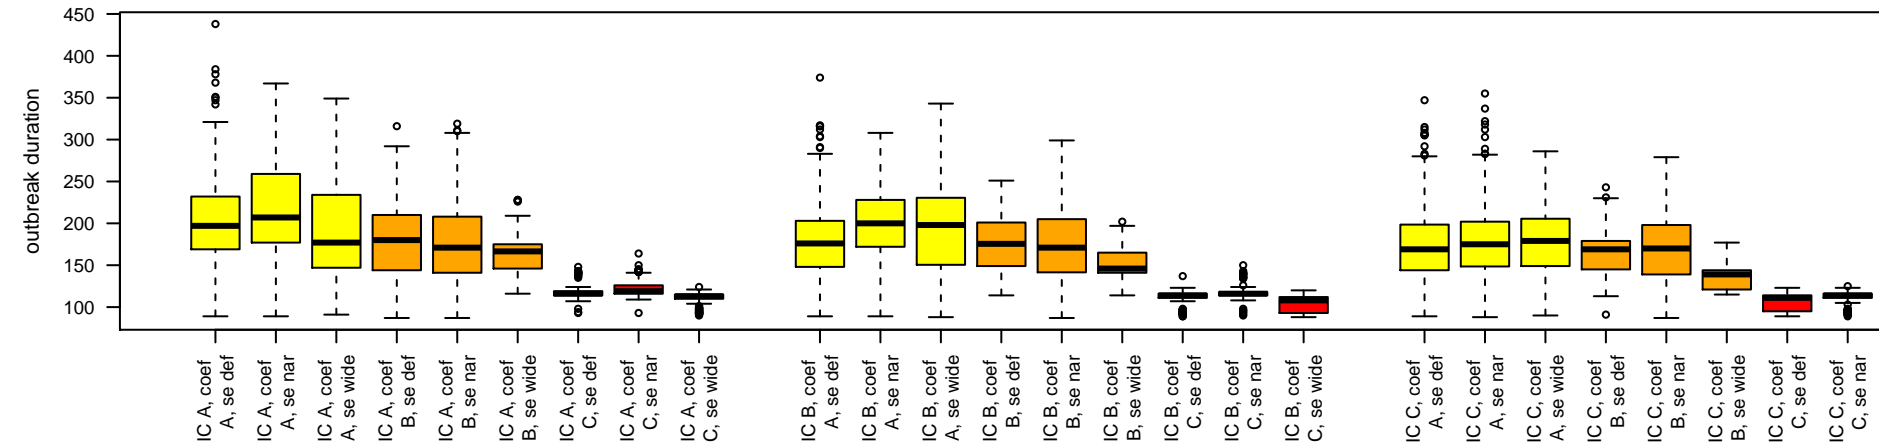

Supplement: pntd.0003876.s013.pdf [file pntd.0003876.s013.pdf]
