# Supplementary material for: Development of a Novel Rabies Simulation Model for Application in a Non-endemic Environment
Source: PubMed Central journal article supplement (PMC4482682; doi:10.1371/journal.pntd.0003876), 2015-06-26

**minimal distance kernel**

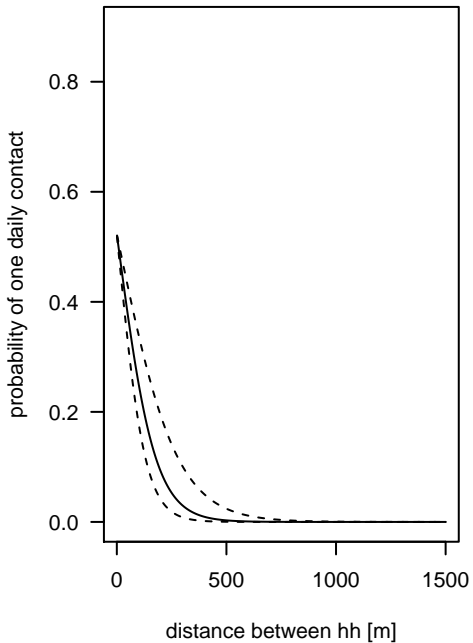

**increased short distance prob**

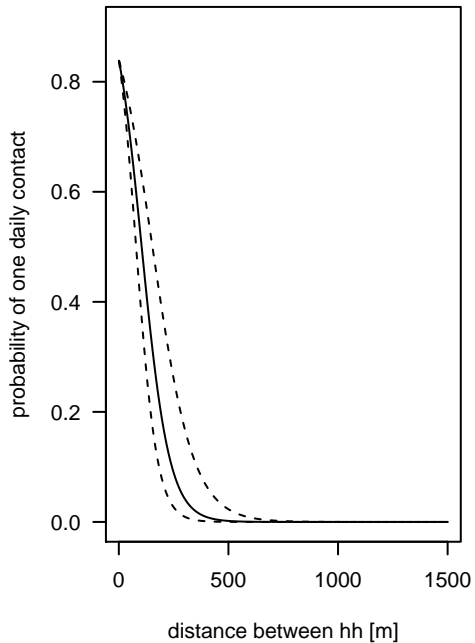

**increased long distance prob**

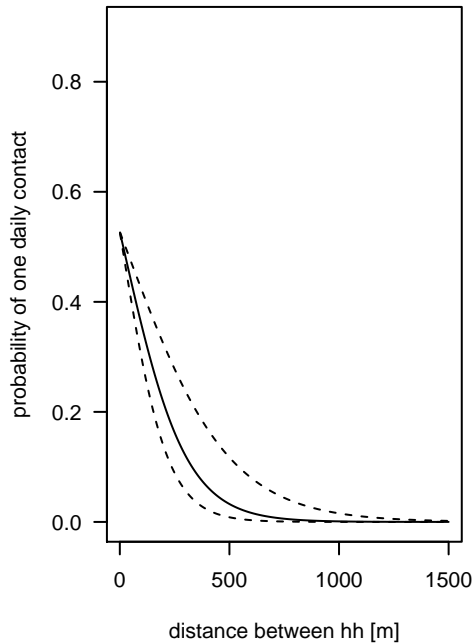

Supplement: pntd.0003876.s002.pdf [file pntd.0003876.s002.pdf]
