# Supplementary material for: Development of a Novel Rabies Simulation Model for Application in a Non-endemic Environment
Source: PubMed Central journal article supplement (PMC4482682; doi:10.1371/journal.pntd.0003876), 2015-06-26

A

**mode = default - 10%**

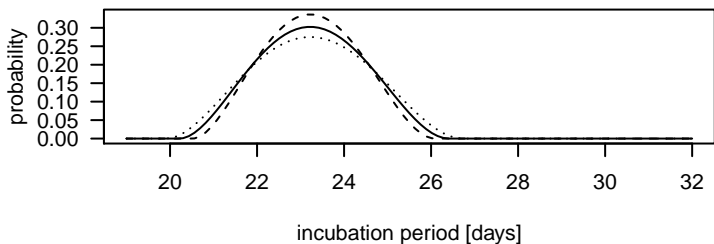

**mode = default**

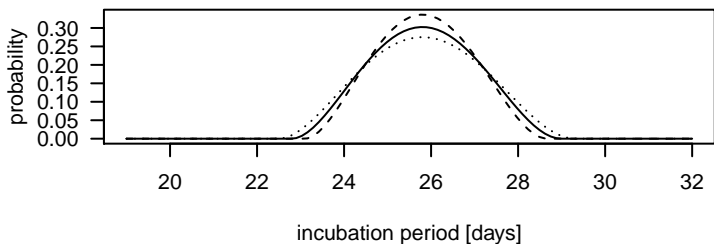

**mode = default + 10%**

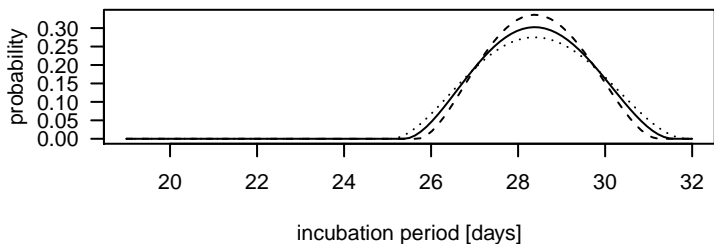

**B****mode = default - 10%**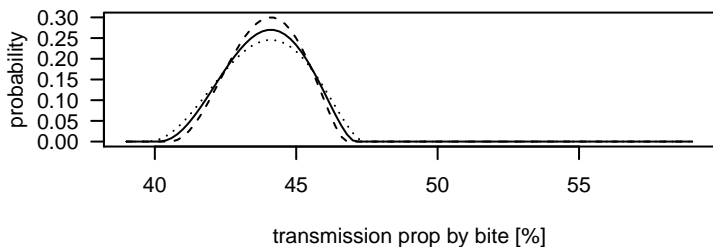**mode = default**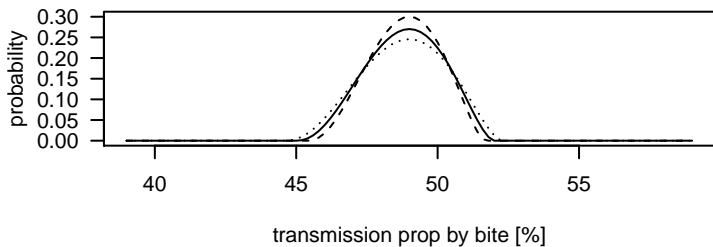**mode = default + 10%**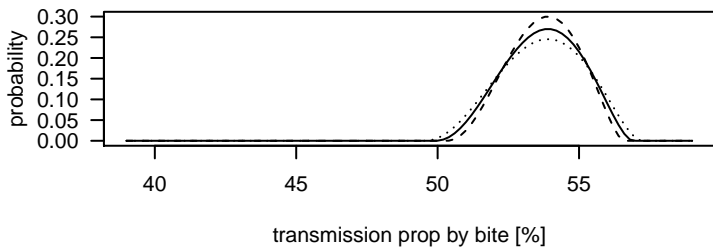

**C****mean = default - 10%**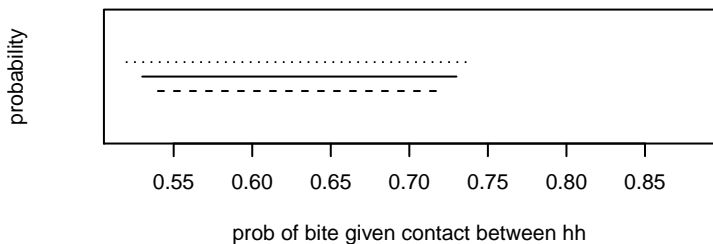**mean = default**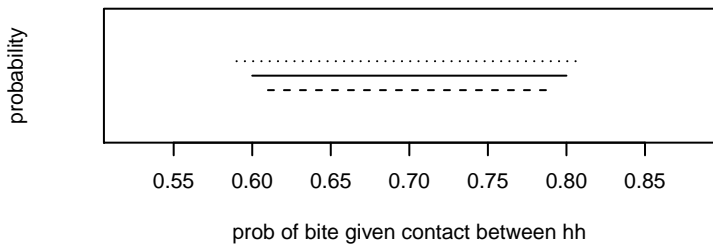**mean = default + 10%**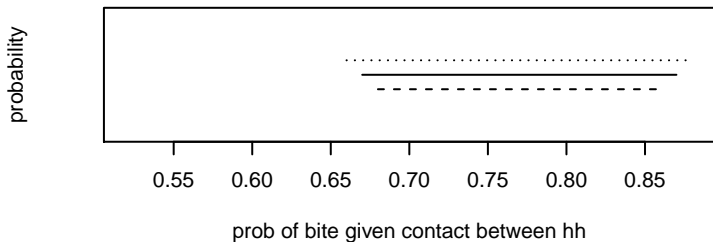

D

**mean = default - 4%**

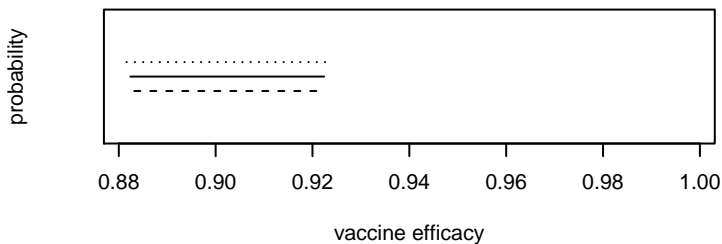

**mean = default**

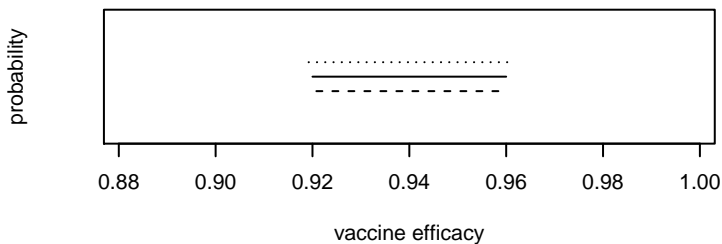

**mean = default + 4%**

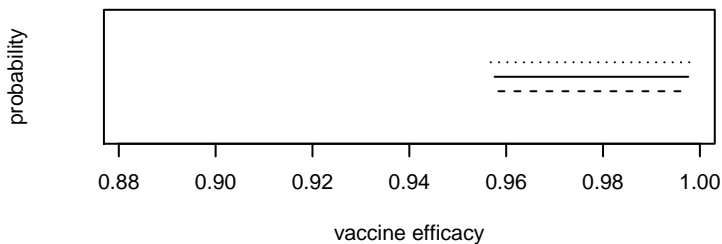

Supplement: pntd.0003876.s004.pdf [file pntd.0003876.s004.pdf]
