# Supplementary material for: Development of a Novel Rabies Simulation Model for Application in a Non-endemic Environment
Source: PubMed Central journal article supplement (PMC4482682; doi:10.1371/journal.pntd.0003876), 2015-06-26

## total number of moved dogs between communities in NPA

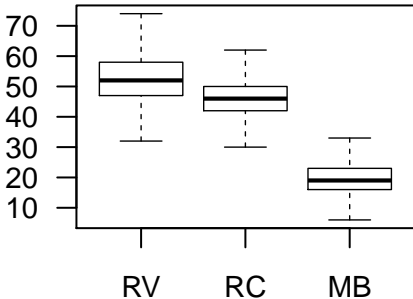

Supplement: pntd.0003876.s007.pdf [file pntd.0003876.s007.pdf]
