# Supplementary material for: Development of a Novel Rabies Simulation Model for Application in a Non-endemic Environment
Source: PubMed Central journal article supplement (PMC4482682; doi:10.1371/journal.pntd.0003876), 2015-06-26

**MB Elcho**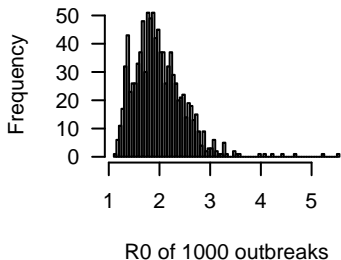**MB NPA**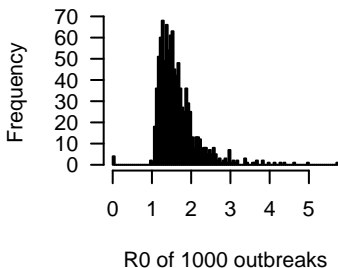**RV Elcho**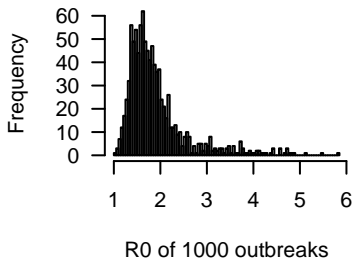**RV NPA**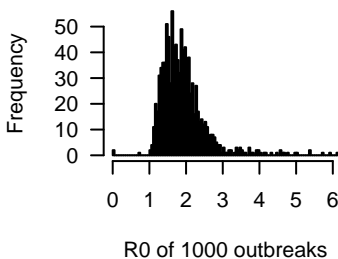**RC Elcho**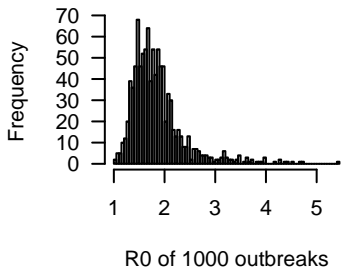**RC NPA**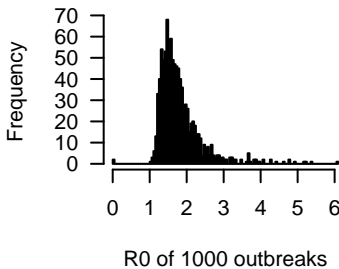

Supplement: pntd.0003876.s009.pdf [file pntd.0003876.s009.pdf]
