# Supplementary material for: Development of a Novel Rabies Simulation Model for Application in a Non-endemic Environment
Source: PubMed Central journal article supplement (PMC4482682; doi:10.1371/journal.pntd.0003876), 2015-06-26

RV\_NPA

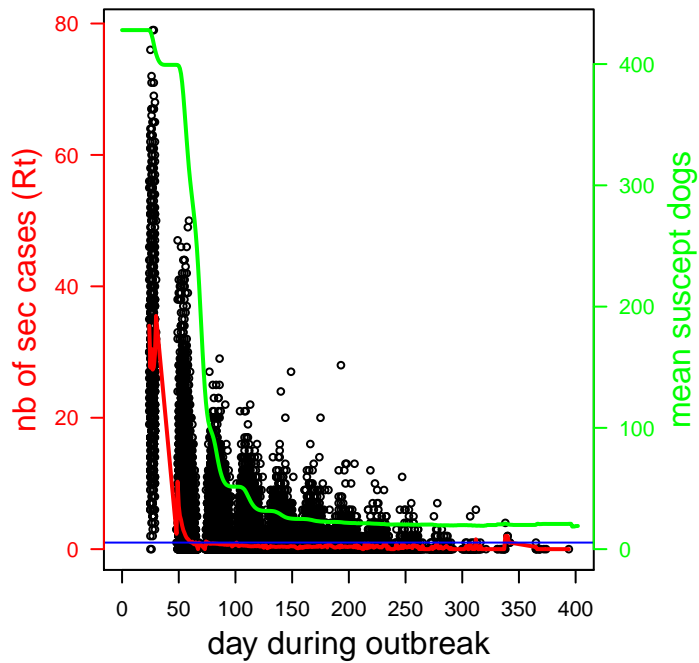

RC\_NPA

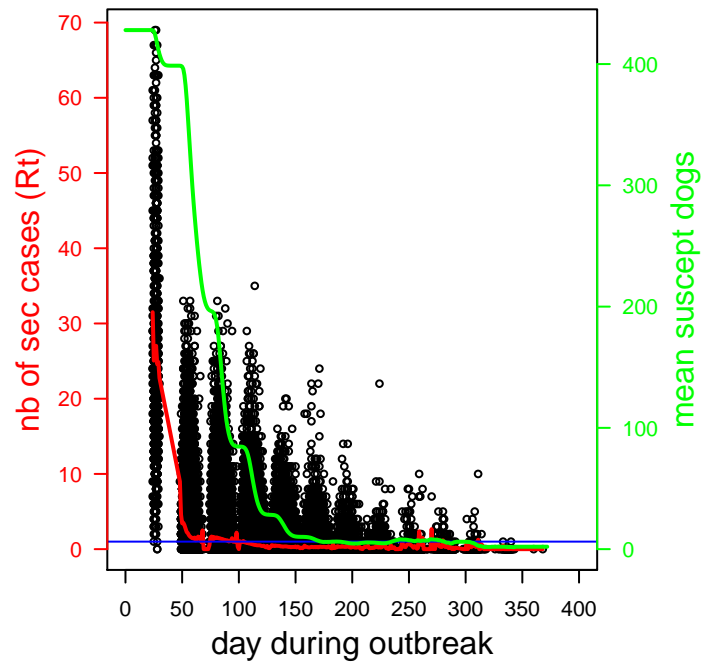

MB\_NPA

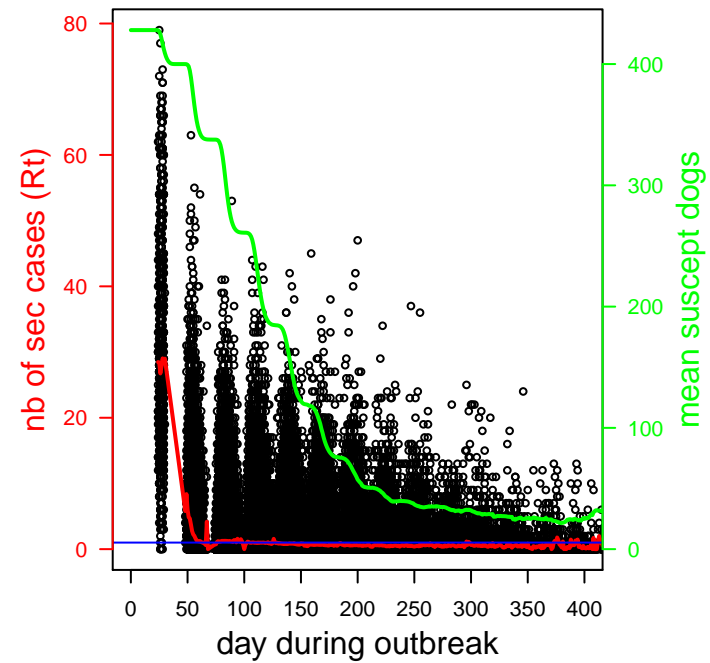

RV\_Elcho

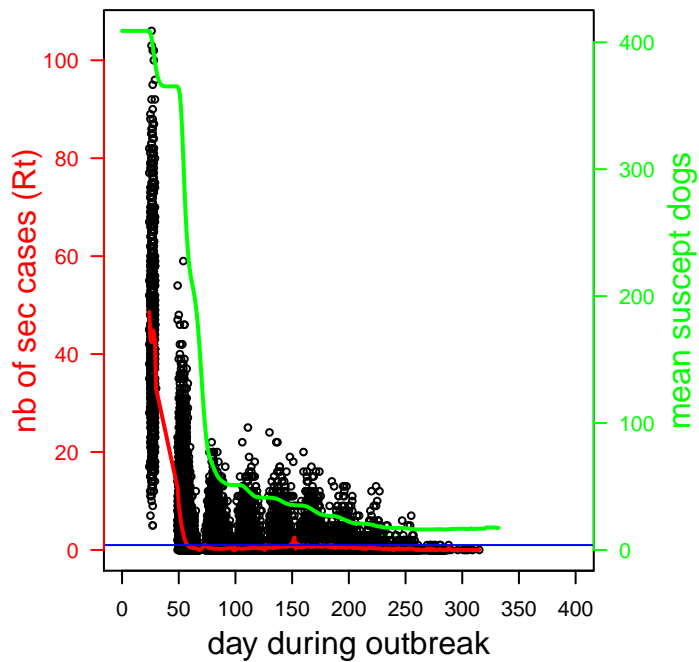

RC\_Elcho

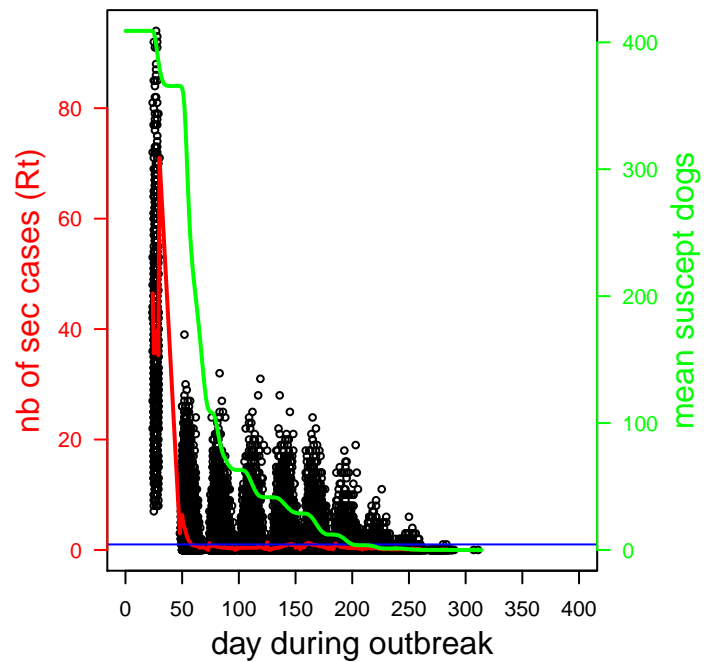

MB\_Elcho

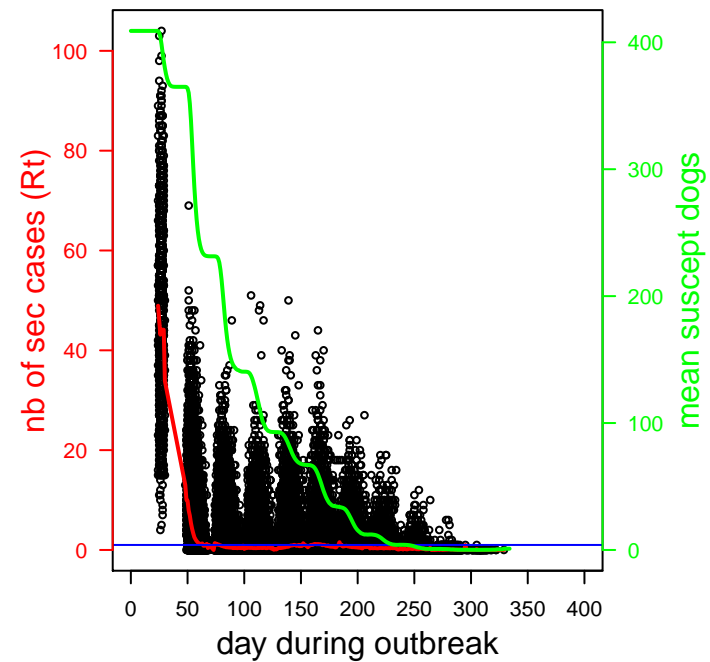

Supplement: pntd.0003876.s010.pdf [file pntd.0003876.s010.pdf]
